# Supplementary material for: webGQT: A Shiny Server for Genotype Query Tools for Model-Based Variant Filtering
Source: PubMed Central journal article supplement (PMC7063093; doi:10.3389/fgene.2020.00152), 2020-03-03

(A)

# Select Phenotype file

## Chose Dataset:

- Case study
- 1000 Genomes
- Upload PED

## Create GQT Database

Upload PED

[i Create GQT database](#)

## Upload PED file

Browse...

1K.phase3.ped

Upload complete

Header

Check Samples 

(B)

# Select Phenotype file

## Chose Dataset:

- Case study
- 1000 Genomes
- Upload PED

## Create GQT Database

Upload PED

[i Create GQT database](#)

**Var1**      **Freq**

Controls    2501

Cases        2

Carriers     1

Show  entries

Search:

|    | FamilyID | IndividualID | Population | SuperPopulation | Gender | Phenotype |
|----|----------|--------------|------------|-----------------|--------|-----------|
| 1  | HG00096  | HG00096      | GBR        | EUR             | male   | 2         |
| 2  | HG00097  | HG00097      | GBR        | EUR             | female | 2         |
| 3  | HG00099  | HG00099      | GBR        | EUR             | female | 3         |
| 4  | HG00100  | HG00100      | GBR        | EUR             | female | 1         |
| 5  | HG00101  | HG00101      | GBR        | EUR             | male   | 1         |
| 6  | HG00102  | HG00102      | GBR        | EUR             | female | 1         |
| 7  | HG00103  | HG00103      | GBR        | EUR             | male   | 1         |
| 8  | HG00105  | HG00105      | GBR        | EUR             | male   | 1         |
| 9  | HG00106  | HG00106      | GBR        | EUR             | female | 1         |
| 10 | HG00107  | HG00107      | GBR        | EUR             | male   | 1         |

Showing 1 to 10 of 2,504 entries

Previous  2 3 4 5 ... 251 Next

Create DB 

Supplement: Image_1.pdf [file Image_1.pdf]
