# Supplementary material for: webGQT: A Shiny Server for Genotype Query Tools for Model-Based Variant Filtering
Source: Front Genet. 2020 Mar 3;11:152. doi: 10.3389/fgene.2020.00152 (PMC7063093; doi:10.3389/fgene.2020.00152)
Supplement: Supplementary file 4 [file Table_2.xlsx]

## Sheet: Sheet1
Supplementary Table 2: Tab-delimted Output of the filtered variants in the VCF file
FORMAT	S111	CHROM	POS	ID	REF	ALT	QUAL	FILTER	AC	AF	AN	ANNOVAR_DATE	Func.ensGene	Gene.ensGene	GeneDetail.ensGene	ExonicFunc.ensGene	AAChange.ensGene	Func.genericGene	Gene.genericGene	GeneDetail.genericGene	ExonicFunc.genericGene	AAChange.genericGene	Func.refGene	Gene.refGene	GeneDetail.refGene	ExonicFunc.refGene	AAChange.refGene	Func.FEELncGene	Gene.FEELncGene	GeneDetail.FEELncGene	ExonicFunc.FEELncGene	AAChange.FEELncGene	phastConsElements46way	gff3	BaseQRankSum	ClippingRankSum	DB	DP	DS	END	ExcessHet	FS	HaplotypeScore	InbreedingCoeff	MLEAC	MLEAF	MQ	MQ0	MQRankSum
GT:AD:DP:GQ:PL	1/1:0,8:8:24:243,24,0	chr27	28664	NA	C	T	16 days, 11:08:00	GATKstd	2	0.008621	508	2017-07-17	intergenic	NONE\x3bENSCAFG00000006260	dist\x3dNONE\x3bdist\x3d11973	.	.	intergenic	NONE\x3bENSCAFG00000006260	dist\x3dNONE\x3bdist\x3d11973	.	.	intergenic	LOC100682606\x3bLOC100686465	dist\x3d2753\x3bdist\x3d11973	.	.	intergenic	NONE\x3bRLOC_00022893_protein_coding	dist\x3dNONE\x3bdist\x3d11973	.	.	.	.	0	0	FALSE	9279	FALSE	NA	0.481944	0	NA	1.49028	6	0.007371	33.89	0	-0.674
GT:AD:DP:GQ:PL	1/1:0,28:28:84:943,84,0	chr27	107310	NA	C	T	36 days, 6:57:00	PASS	2	0.001818	658	2017-07-17	intergenic	OR6C74\x3bCOR6C47	dist\x3d7670\x3bdist\x3d5402	.	.	intergenic	OR6C74\x3bENSCAFG00000025348	dist\x3d7670\x3bdist\x3d5402	.	.	intergenic	OR6C74\x3bCOR6C47	dist\x3d7670\x3bdist\x3d5402	.	.	intergenic	RLOC_00022896_protein_coding\x3bRLOC_00022897_protein_coding	dist\x3d7670\x3bdist\x3d5402	.	.	.	.	NA	NA	FALSE	18497	FALSE	NA	0.0044	0	NA	0.314583	2	0.001815	57.97	0	NA
GT:AD:DP:GQ:PL	1/1:0,21:21:62:633,62,0	chr27	133114	NA	G	A	560.61	PASS	2	0.001869	646	2017-07-17	intergenic	ENSCAFG00000006304\x3bOR10A7	dist\x3d10024\x3bdist\x3d8252	.	.	intergenic	ENSCAFG00000006304\x3bOR10A7	dist\x3d10024\x3bdist\x3d8252	.	.	intronic	COR6C33	.	.	.	intergenic	RLOC_00022898_protein_coding\x3bRLOC_00022899_protein_coding	dist\x3d10024\x3bdist\x3d8252	.	.	.	.	NA	NA	FALSE	13328	FALSE	NA	0.0044	0	NA	4.39444	2	0.001866	53.93	0	NA
GT:AD:DP:GQ:PL	1/1:0,15:15:45:463,45,0	chr27	143079	NA	C	T	16 days, 6:52:00	PASS	2	0.001818	658	2017-07-17	exonic	OR10A7	.	nonsynonymous_SNV	OR10A7:ENSCAFT00000010203.3:exon1:c.121G>A:p.G41S	exonic	OR10A7	.	nonsynonymous_SNV	OR10A7:OR10A7:exon1:c.121G>A:p.G41S	exonic	LOC486482	.	nonsynonymous_SNV	LOC486482:XM_543608.4:exon1:c.121G>A:p.G41S	exonic	RLOC_00022899_protein_coding	.	nonsynonymous_SNV	RLOC_00022899_protein_coding:OR10A7_1:exon1:c.121G>A:p.G41S	Score\x3d259\x3bName\x3dlod\x3d15	.	NA	NA	FALSE	17214	FALSE	NA	0.0044	0	NA	0.492361	2	0.001815	60	0	NA
GT:AD:DP:GQ:PGT:PID:PL	1/1:0,13:13:40:.:.:561,40,0	chr27	151290	NA	TTAAATAAATAAA	T	154547	PASS	2	0.004664	648	2017-07-17	intergenic	OR10A7\x3bENSCAFG00000032428	dist\x3d8092\x3bdist\x3d6510	.	.	intergenic	OR10A7\x3bENSCAFG00000032428	dist\x3d8092\x3bdist\x3d6510	.	.	intronic	COR6C33	.	.	.	intergenic	RLOC_00022899_protein_coding\x3bRLOC_00022900_protein_coding	dist\x3d8092\x3bdist\x3d6510	.	.	.	.	0.174306	0	FALSE	15737	FALSE	NA	0.0019	0	NA	00:23:00	3	0.002793	62.69	0	0
GT:AD:DP:GQ:PL	1/1:0,26:26:78:874,78,0	chr27	155659	NA	G	A	33 days, 9:49:00	PASS	2	0.001825	658	2017-07-17	intergenic	OR10A7\x3bENSCAFG00000032428	dist\x3d12460\x3bdist\x3d2153	.	.	intergenic	OR10A7\x3bENSCAFG00000032428	dist\x3d12460\x3bdist\x3d2153	.	.	intronic	COR6C33	.	.	.	intergenic	RLOC_00022899_protein_coding\x3bRLOC_00022900_protein_coding	dist\x3d12460\x3bdist\x3d2153	.	.	.	.	NA	NA	FALSE	16772	FALSE	NA	0.0044	0	NA	4.1125	2	0.001821	60	0	NA
GT:AD:DP:GQ:PGT:PID:PL	1/1:0,24:24:75:1|1:199752_G_A:1102,75,0	chr27	199752	NA	G	A	42 days, 21:58:00	PASS	2	0.001842	646	2017-07-17	intergenic	ENSCAFG00000032428\x3bENSCAFG00000029448	dist\x3d7617\x3bdist\x3d4261	.	.	intergenic	ENSCAFG00000032428\x3bENSCAFG00000029802	dist\x3d7617\x3bdist\x3d36033	.	.	intergenic	COR6C33\x3bcOR9K3	dist\x3d7908\x3bdist\x3d4329	.	.	intergenic	RLOC_00022900_protein_coding\x3bRLOC_00022901_pseudogene	dist\x3d7617\x3bdist\x3d4261	.	.	.	.	-2.254	0	FALSE	18313	FALSE	NA	0.0044	0.366667	NA	3.74653	2	0.001838	1 day, 23:36:00	0	0
GT:AD:DP:GQ:PL	1/1:0,23:23:67:675,67,0	chr27	355787	NA	G	A	25 days, 2:55:00	PASS	2	0.001838	658	2017-07-17	intergenic	OR9K2\x3bNEUROD4	dist\x3d49770\x3bdist\x3d33308	.	.	intergenic	ENSCAFG00000031702\x3bNEUROD4	dist\x3d49770\x3bdist\x3d33308	.	.	intergenic	LOC486487\x3bNEUROD4	dist\x3d23123\x3bdist\x3d29022	.	.	intergenic	RLOC_00022906_protein_coding\x3bRLOC_00022907_protein_coding	dist\x3d49770\x3bdist\x3d33308	.	.	.	.	NA	NA	FALSE	15120	FALSE	NA	0.0044	0	NA	4.27014	2	0.001835	60	0	NA
GT:AD:DP:GQ:PL	1/1:0,17:17:51:561,51,0	chr27	356370	NA	G	A	22 days, 22:25:00	PASS	2	0.001821	658	2017-07-17	intergenic	OR9K2\x3bNEUROD4	dist\x3d50353\x3bdist\x3d32725	.	.	intergenic	ENSCAFG00000031702\x3bNEUROD4	dist\x3d50353\x3bdist\x3d32725	.	.	intergenic	LOC486487\x3bNEUROD4	dist\x3d23706\x3bdist\x3d28439	.	.	intergenic	RLOC_00022906_protein_coding\x3bRLOC_00022907_protein_coding	dist\x3d50353\x3bdist\x3d32725	.	.	.	.	NA	NA	FALSE	15093	FALSE	NA	0.0044	0	NA	4.0875	2	0.001818	60	0	NA
GT:AD:DP:GQ:PL	1/1:0,14:14:41:431,41,0	chr27	530792	NA	G	A	358.65	PASS	2	0.001812	658	2017-07-17	intergenic	ENSCAFG00000036831\x3bENSCAFG00000033630	dist\x3d44168\x3bdist\x3d26129	.	.	intergenic	MUCL1\x3bCFRNASEQ_PROT_00100931	human\x3bdist\x3d27366\x3bdist\x3d24446	.	.	intronic	LOC106557890	.	.	.	ncRNA_intronic	RLOC_00022911_lincRNA	.	.	.	.	.	NA	NA	FALSE	15172	FALSE	NA	0.0044	0	NA	4.26944	2	0.001808	60	0	NA
GT:AD:DP:GQ:PGT:PID:PL	1/1:0,22:22:66:1|1:544247_T_C:974,66,0	chr27	544268	NA	C	T	37 days, 13:44:00	PASS	2	0.001821	658	2017-07-17	intergenic	ENSCAFG00000036831\x3bENSCAFG00000033630	dist\x3d57644\x3bdist\x3d12653	.	.	intergenic	MUCL1\x3bCFRNASEQ_PROT_00100931	human\x3bdist\x3d40842\x3bdist\x3d10970	.	.	intergenic	LOC106557890\x3bLACRT	dist\x3d11678\x3bdist\x3d191371	.	.	intergenic	RLOC_00022911_lincRNA\x3bRLOC_00022912_lincRNA	dist\x3d11653\x3bdist\x3d6127	.	.	.	.	NA	NA	FALSE	18173	FALSE	NA	0.0044	0	NA	5.05625	2	0.001818	2 days, 10:26:00	0	NA
GT:AD:DP:GQ:PGT:PID:PL	1/1:0,12:12:36:1|1:591052_G_A:540,36,0	chr27	591054	NA	A	G	467.98	PASS	2	0.001821	658	2017-07-17	intergenic	ENSCAFG00000033630\x3bENSCAFG00000036159	dist\x3d32989\x3bdist\x3d145545	.	.	intergenic	CFRNASEQ_PROT_00100931\x3bLACRT	dist\x3d1400\x3bhuman\x3bdist\x3d144604	.	.	intergenic	LOC106557890\x3bLACRT	dist\x3d58464\x3bdist\x3d144585	.	.	intergenic	RLOC_00022913_glncRNA\x3bRLOC_00022914_TUCp	dist\x3d1400\x3bdist\x3d7508	.	.	.	.	NA	NA	FALSE	13700	FALSE	NA	0.0044	0	NA	4.98056	2	0.001818	51.62	0	NA
GT:AD:DP:GQ:PL	1/1:0,15:15:47:659,47,0	chr27	659389	NA	ATTATCTCATGGGACCTTCATGGTCAATGACCATATTATCTCATGGGACCTTCATGGCCAATGACTATG	A	1004.78	PASS	2	0.001821	658	2017-07-17	intergenic	ENSCAFG00000033630\x3bENSCAFG00000036159	dist\x3d101325\x3bdist\x3d77142	.	.	intergenic	CFRNASEQ_PROT_00100931\x3bLACRT	dist\x3d69736\x3bhuman\x3bdist\x3d76201	.	.	intergenic	LOC106557890\x3bLACRT	dist\x3d126800\x3bdist\x3d76182	.	.	intergenic	RLOC_00022914_TUCp\x3bRLOC_00022915_protein_coding	dist\x3d56754\x3bdist\x3d76201	.	.	.	.	NA	NA	FALSE	17372	FALSE	NA	0.0909722	0	NA	3.84792	2	0.001818	1 day, 12:04:00	0	NA
GT:AD:DP:GQ:PL:PGT:PID	1/1:0,15:15:47:659,47,0:.:.	chr27	659452	NA	A	*	27430.5	PASS	2	0.001828	654	2017-07-17	intergenic	ENSCAFG00000033630\x3bENSCAFG00000036159	dist\x3d101387\x3bdist\x3d77147	.	.	intergenic	CFRNASEQ_PROT_00100931\x3bLACRT	dist\x3d69798\x3bhuman\x3bdist\x3d76206	.	.	intergenic	LOC106557890\x3bLACRT	dist\x3d126862\x3bdist\x3d76187	.	.	intergenic	RLOC_00022914_TUCp\x3bRLOC_00022915_protein_coding	dist\x3d56816\x3bdist\x3d76206	.	.	.	.	-1.424	0	FALSE	17977	FALSE	NA	2.45903	02:43:00	NA	0.670139	2	0.001825	2 days, 8:27:00	0	0.276389
GT:AD:DP:GQ:PGT:PID:PL	1/1:0,10:10:31:.:.:382,31,0,.,.,.	chr27	659706	NA	G	*,T	9205.73	GATKstd	2	0.028,0.0009158	656	2017-07-17	intergenic	ENSCAFG00000033630\x3bENSCAFG00000036159	dist\x3d101641\x3bdist\x3d76893	.	.	intergenic	CFRNASEQ_PROT_00100931\x3bLACRT	dist\x3d70052\x3bhuman\x3bdist\x3d75952	.	.	intergenic	LOC106557890\x3bLACRT	dist\x3d127116\x3bdist\x3d75933	.	.	intergenic	RLOC_00022914_TUCp\x3bRLOC_00022915_protein_coding	dist\x3d57070\x3bdist\x3d75952	.	.	.	.	-0.813	0	FALSE	17514	FALSE	NA	0.621528	0.55	NA	0.927083	14.1	0.028,0.0009141	36.62	0	-1.641
GT:AD:DP:GQ:PGT:PID:PL	1/1:0,10:10:31:.:.:382,31,0	chr27	659742	NA	C	*	11470.5	NA	2	0.028	298	2017-07-17	intergenic	ENSCAFG00000033630\x3bENSCAFG00000036159	dist\x3d101677\x3bdist\x3d76857	.	.	intergenic	CFRNASEQ_PROT_00100931\x3bLACRT	dist\x3d70088\x3bhuman\x3bdist\x3d75916	.	.	intergenic	LOC106557890\x3bLACRT	dist\x3d127152\x3bdist\x3d75897	.	.	intergenic	RLOC_00022914_TUCp\x3bRLOC_00022915_protein_coding	dist\x3d57106\x3bdist\x3d75916	.	.	.	.	-0.116	0	FALSE	5555	FALSE	NA	0.0001	0.390972	NA	2.05208	14	0.028	1 day, 21:05:00	0	-1.434
GT:AD:DP:GQ:PGT:PID:PL	1/1:0,16:16:51:1|1:664331_C_G:750,51,0	chr27	664331	NA	C	G	45 days, 4:54:00	PASS	2	0.001838	656	2017-07-17	intergenic	ENSCAFG00000033630\x3bENSCAFG00000036159	dist\x3d106266\x3bdist\x3d72268	.	.	intergenic	CFRNASEQ_PROT_00100931\x3bLACRT	dist\x3d74677\x3bhuman\x3bdist\x3d71327	.	.	intergenic	LOC106557890\x3bLACRT	dist\x3d131741\x3bdist\x3d71308	.	.	intergenic	RLOC_00022914_TUCp\x3bRLOC_00022915_protein_coding	dist\x3d61695\x3bdist\x3d71327	.	.	.	.	00:04:00	0	FALSE	14312	FALSE	NA	0.0909722	07:35:00	NA	2.17708	2	0.001835	2 days, 11:15:00	0	0
GT:AD:DP:GQ:PL	1/1:0,10:10:30:341,30,0	chr27	688903	NA	G	T	32 days, 18:48:00	PASS	2	0.001821	658	2017-07-17	intergenic	ENSCAFG00000033630\x3bENSCAFG00000036159	dist\x3d130838\x3bdist\x3d47696	.	.	intergenic	CFRNASEQ_PROT_00100931\x3bLACRT	dist\x3d99249\x3bhuman\x3bdist\x3d46755	.	.	intergenic	LOC106557890\x3bLACRT	dist\x3d156313\x3bdist\x3d46736	.	.	intergenic	RLOC_00022914_TUCp\x3bRLOC_00022915_protein_coding	dist\x3d86267\x3bdist\x3d46755	.	.	Score\x3d243\x3bName\x3dlod\x3d13	.	01:13:00	0	FALSE	15761	FALSE	NA	0.184028	0	NA	3.10278	1	0.0009091	2 days, 11:38:00	0	0
GT:AD:DP:GQ:PL	1/1:1,20:21:27:595,27,0	chr27	715428	NA	A	T	21 days, 21:45:00	PASS	2	0.001825	658	2017-07-17	intergenic	ENSCAFG00000033630\x3bENSCAFG00000036159	dist\x3d157363\x3bdist\x3d21171	.	.	intergenic	CFRNASEQ_PROT_00100931\x3bLACRT	dist\x3d125774\x3bhuman\x3bdist\x3d20230	.	.	intergenic	LOC106557890\x3bLACRT	dist\x3d182838\x3bdist\x3d20211	.	.	intergenic	RLOC_00022914_TUCp\x3bRLOC_00022915_protein_coding	dist\x3d112792\x3bdist\x3d20230	.	.	.	.	-1.625	0	FALSE	17326	FALSE	NA	0.0044	0	NA	4.40486	1	0.0009107	60	0	0
GT:AD:DP:GQ:PGT:PID:PL	1/1:0,17:17:51:.:.:549,51,0	chr27	731719	NA	C	T	68 days, 18:08:00	NA	2	0.006667	268	2017-07-17	intergenic	ENSCAFG00000033630\x3bENSCAFG00000036159	dist\x3d173654\x3bdist\x3d4880	.	.	intergenic	CFRNASEQ_PROT_00100931\x3bLACRT	dist\x3d142065\x3bhuman\x3bdist\x3d3939	.	.	intergenic	LOC106557890\x3bLACRT	dist\x3d199129\x3bdist\x3d3920	.	.	intergenic	RLOC_00022914_TUCp\x3bRLOC_00022915_protein_coding	dist\x3d129083\x3bdist\x3d3939	.	.	.	.	02:36:00	0	FALSE	3658	FALSE	NA	0.927778	0.663889	NA	0.9	3	0.006667	24.88	NA	0
GT:AD:DP:GQ:PL	1/1:0,3:3:9:133,9,0	chr27	1272393	NA	C	CGGG	1366.78	NA	2	0.026	164	2017-07-17	UTR3	HOXC10	ENSCAFT00000010694.3:c.*737_*738insCCC	.	.	exonic	HOXC10	.	unknown	UNKNOWN	UTR3	HOXC10	XM_543626.6:c.*737_*738insCCC	.	.	UTR3	RLOC_00022952_protein_coding	HOXC10_1:c.*737_*738insCCC\x3bTCONS_00111635:c.*737_*738insCCC\x3bTCONS_00111638:c.*737_*738insCCC\x3bTCONS_00111639:c.*1170_*1171insCCC\x3bHOXC10_2:c.*737_*738insCCC	.	.	.	.	0.2875	0	FALSE	3563	FALSE	NA	0.31875	0.534028	NA	3.67569	4	0.017	0.554861	NA	0
GT:AD:DP:GQ:PGT:PID:PL	1/1:0,2:2:9:1|1:1343234_A_T:125,9,0	chr27	1343251	NA	TCTTTCTTTCG	T	148 days, 21:45:00	NA	2	0.004082	298	2017-07-17	intergenic	HOXC13\x3bENSCAFG00000028208	dist\x3d19882\x3bdist\x3d120774	.	.	intergenic	HOXC13\x3bENSCAFG00000006653	dist\x3d19784\x3bdist\x3d126467	.	.	intergenic	HOXC13\x3bCALCOCO1	dist\x3d19782\x3bdist\x3d182308	.	.	intergenic	RLOC_00022962_antisense_mRNA\x3bRLOC_00022963_miRNA	dist\x3d16846\x3bdist\x3d120774	.	.	.	.	NA	NA	FALSE	4281	FALSE	NA	0.269444	0.911806	NA	00:16:00	1	0.002041	0.273611	NA	NA
GT:AD:DP:GQ:PL	1/1:0,21:21:63:691,63,0	chr27	2505179	NA	C	T	83 days, 17:01:00	GATKstd	2	0.007366	658	2017-07-17	intronic	KRT71\x3bKRT72	.	.	.	intronic	KRT74	.	.	.	intronic	LOC486520	.	.	.	intronic	RLOC_00023007_protein_coding	.	.	.	.	.	0.414583	0.281944	FALSE	14095	FALSE	NA	0.0044	0	NA	3.7875	8	0.007353	60	0	00:38:00
GT:AD:DP:GQ:PL	1/1:0,10:10:30:312,30,0	chr27	2505972	NA	C	T	928.87	PASS	2	0.007767	626	2017-07-17	intronic	KRT71\x3bKRT72	.	.	.	intronic	KRT74	.	.	.	intronic	LOC486520	.	.	.	intronic	RLOC_00023007_protein_coding	.	.	.	.	.	01:12:00	0	FALSE	11942	FALSE	NA	0.0923611	0	NA	0.251389	8	0.007752	60	0	0.175694
GT:AD:DP:GQ:PGT:PID:PL	1/1:0,18:18:57:1|1:2543230_C_A:849,57,0	chr27	2543230	NA	C	A	163 days, 2:43:00	GATKstd	2	0.005376	648	2017-07-17	exonic	KRT71	.	nonsynonymous_SNV	KRT71:ENSCAFT00000011649.3:exon7:c.1266C>A:p.S422R	intergenic	KRT74\x3bKRT75	dist\x3d34798\x3bdist\x3d91881	.	.	exonic	KRT71	.	nonsynonymous_SNV	KRT71:NM_001197029.1:exon7:c.1266C>A:p.S422R	exonic	RLOC_00023007_protein_coding	.	nonsynonymous_SNV	RLOC_00023007_protein_coding:KRT74_16:exon7:c.1266C>A:p.S422R,RLOC_00023007_protein_coding:KRT74_12:exon8:c.1290C>A:p.S430R	Score\x3d633\x3bName\x3dlod\x3d499	.	01:25:00	0	FALSE	20683	FALSE	NA	0.0044	0	NA	4.72083	1	0.005263	2 days, 10:09:00	0	-0.278
GT:AD:DP:GQ:PGT:PID:PL	1/1:0,19:19:60:1|1:2543230_C_A:884,60,0	chr27	2543231	NA	CTG	C	163 days, 20:29:00	PASS	2	0.005376	648	2017-07-17	exonic	KRT71	.	frameshift_deletion	KRT71:ENSCAFT00000011649.3:exon7:c.1268_1269del:p.L423fs	intergenic	KRT74\x3bKRT75	dist\x3d34800\x3bdist\x3d91878	.	.	exonic	KRT71	.	frameshift_deletion	KRT71:NM_001197029.1:exon7:c.1268_1269del:p.L423fs	exonic	RLOC_00023007_protein_coding	.	frameshift_deletion	RLOC_00023007_protein_coding:KRT74_16:exon7:c.1268_1269del:p.L423fs,RLOC_00023007_protein_coding:KRT74_12:exon8:c.1292_1293del:p.L431fs	Score\x3d633\x3bName\x3dlod\x3d499	.	0.0993056	0	FALSE	20644	FALSE	NA	0.0044	0	NA	5.25208	1	0.005263	56.72	0	0.622222
GT:AD:DP:GQ:PGT:PID:PL	1/1:0,20:20:60:1|1:2543230_C_A:884,60,0	chr27	2543234	NA	AAGC	A	163 days, 20:28:00	PASS	2	0.005376	648	2017-07-17	exonic	KRT71	.	nonframeshift_deletion	KRT71:ENSCAFT00000011649.3:exon7:c.1271_1273del:p.424_425del	intergenic	KRT74\x3bKRT75	dist\x3d34803\x3bdist\x3d91874	.	.	exonic	KRT71	.	nonframeshift_deletion	KRT71:NM_001197029.1:exon7:c.1271_1273del:p.424_425del	exonic	RLOC_00023007_protein_coding	.	nonframeshift_deletion	RLOC_00023007_protein_coding:KRT74_16:exon7:c.1271_1273del:p.424_425del,RLOC_00023007_protein_coding:KRT74_12:exon8:c.1295_1297del:p.432_433del	Score\x3d633\x3bName\x3dlod\x3d499	.	0.386111	0	FALSE	20668	FALSE	NA	0.0044	0	NA	4.1625	1	0.005263	2 days, 10:28:00	0	0.308333
GT:AD:DP:GQ:PGT:PID:PL	1/1:0,3:3:9:1|1:2770665_T_G:135,9,0	chr27	2770669	NA	T	G	125 days, 9:53:00	GATKstd	2	00:01:00	96	2017-07-17	intronic	ENSCAFG00000007307\x3bKRT5	.	.	.	intergenic	ENSCAFG00000007311\x3bENSCAFG00000007318	dist\x3d18453\x3bdist\x3d16720	.	.	intergenic	KRT86\x3bKRT81	dist\x3d3525\x3bdist\x3d6024	.	.	intronic	RLOC_00023015_protein_coding\x3bRLOC_00023022_protein_coding	.	.	.	.	.	0.659028	0	FALSE	1102	FALSE	NA	0.186806	0	NA	3.80764	16	00:01:00	42.95	0	-0.8
GT:AD:DP:GQ:PGT:PID:PL	1/1:0,4:4:12:1|1:2770665_T_G:180,12,0	chr27	2770673	NA	T	G	194 days, 23:12:00	GATKstd	2	0.0701389	96	2017-07-17	intronic	ENSCAFG00000007307\x3bKRT5	.	.	.	intergenic	ENSCAFG00000007311\x3bENSCAFG00000007318	dist\x3d18457\x3bdist\x3d16716	.	.	intergenic	KRT86\x3bKRT81	dist\x3d3529\x3bdist\x3d6020	.	.	intronic	RLOC_00023015_protein_coding\x3bRLOC_00023022_protein_coding	.	.	.	.	.	0.671528	0	FALSE	1130	FALSE	NA	0.186806	0	NA	3.94861	14	0.089	1 day, 22:23:00	0	-0.972
GT:AD:DP:GQ:PGT:PID:PL	1/1:0,4:4:12:1|1:2770665_T_G:180,12,0	chr27	2770677	NA	T	G	131 days, 23:09:00	GATKstd	2	0.0701389	96	2017-07-17	intronic	ENSCAFG00000007307\x3bKRT5	.	.	.	intergenic	ENSCAFG00000007311\x3bENSCAFG00000007318	dist\x3d18461\x3bdist\x3d16712	.	.	intergenic	KRT86\x3bKRT81	dist\x3d3533\x3bdist\x3d6016	.	.	intronic	RLOC_00023015_protein_coding\x3bRLOC_00023022_protein_coding	.	.	.	.	.	0.538889	0	FALSE	1152	FALSE	NA	0.186806	0	NA	4.33056	16	0.0701389	1 day, 22:23:00	0	-1.068
GT:AD:DP:GQ:PGT:PID:PL	1/1:0,4:4:12:1|1:2770665_T_G:180,12,0	chr27	2770681	NA	T	G	198 days, 7:18:00	GATKstd	2	0.0701389	96	2017-07-17	intronic	ENSCAFG00000007307\x3bKRT5	.	.	.	intergenic	ENSCAFG00000007311\x3bENSCAFG00000007318	dist\x3d18465\x3bdist\x3d16708	.	.	intergenic	KRT86\x3bKRT81	dist\x3d3537\x3bdist\x3d6012	.	.	intronic	RLOC_00023015_protein_coding\x3bRLOC_00023022_protein_coding	.	.	.	.	.	0.468056	0	FALSE	1198	FALSE	NA	0.186806	0	NA	4.08056	15	0.095	1 day, 22:23:00	0	-1.141
GT:AD:DP:GQ:PGT:PID:PL	1/1:0,9:9:27:1|1:2770778_T_C:400,27,0	chr27	2770801	NA	G	A	124 days, 13:47:00	PASS	2	0.0784722	98	2017-07-17	intronic	ENSCAFG00000007307\x3bKRT5	.	.	.	intergenic	ENSCAFG00000007311\x3bENSCAFG00000007318	dist\x3d18585\x3bdist\x3d16588	.	.	intergenic	KRT86\x3bKRT81	dist\x3d3657\x3bdist\x3d5892	.	.	intronic	RLOC_00023015_protein_coding\x3bRLOC_00023022_protein_coding	.	.	.	.	.	02:03:00	0	FALSE	1342	FALSE	NA	0.181944	0	NA	5.59861	17	0.0736111	47.62	0	-1.106
GT:AD:DP:GQ:PGT:PID:PL	1/1:0,4:4:10:1|1:2804236_G_GCCCCCCCCGCCCCATGCCCCATGCCACATGCCCTCTGCCACAAGCCCCCCGCCGCATGCCCCCCA:176,10,0	chr27	2804236	NA	G	GCCCCCCCCGCCCCATGCCCCATGCCACATGCCCTCTGCCACAAGCCCCCCGCCGCATGCCCCCCA	8679.63	PASS	2	0.0770833	12	2017-07-17	intronic	ENSCAFG00000007307\x3bKRT5	.	.	.	intergenic	ENSCAFG00000007318\x3bENSCAFG00000007307	dist\x3d11499\x3bdist\x3d8128	.	.	upstream	LOC486533	dist\x3d918	.	.	intronic	RLOC_00023015_protein_coding\x3bRLOC_00023022_protein_coding	.	.	.	.	.	NA	NA	FALSE	870	FALSE	NA	0.196528	0	NA	NA	1	0.056	19:32:00	0	NA
GT:AD:DP:GQ:PGT:PID:PL	1/1:0,1:1:3:1|1:4673514_T_C:45,3,0	chr27	4673518	NA	GGCTGA	G	38785.4	NA	2	0.015	232	2017-07-17	intergenic	ASIC1\x3bENSCAFG00000040044	dist\x3d9537\x3bdist\x3d5414	.	.	intergenic	ASIC1\x3bRACGAP1	dist\x3d9537\x3bdist\x3d16302	.	.	intergenic	ASIC1\x3bRACGAP1	dist\x3d10167\x3bdist\x3d16391	.	.	intronic	RLOC_00023073_protein_coding	.	.	.	.	.	0.267361	0	FALSE	2626	FALSE	NA	0	0.372917	NA	3.24514	4	00:01:00	1 day, 14:23:00	NA	0
GT:AD:DP:GQ:PGT:PID:PL	1/1:0,1:1:3:1|1:4733745_G_GCCCCCTGCT:45,3,0	chr27	4733748	NA	G	T	1 day, 1:13:00	NA	2	1	2	2017-07-17	intergenic	AQP6\x3bENSCAFG00000008380	dist\x3d2432\x3bdist\x3d1497	.	.	intergenic	AQP6\x3bAQP5	dist\x3d2432\x3bdist\x3d1497	.	.	intergenic	LOC607978\x3bAQP5	dist\x3d1920\x3bdist\x3d1565	.	.	intergenic	RLOC_00023075_glncRNA\x3bRLOC_00023076_protein_coding	dist\x3d1466\x3bdist\x3d1497	.	.	.	.	NA	NA	FALSE	5454	FALSE	NA	0.196528	0	NA	NA	2	1	0.05625	NA	NA
GT:AD:DP:GQ:PGT:PID:PL	1/1:0,1:1:3:.:.:33,3,0	chr27	5247393	NA	C	CAA	49899.6	NA	2	0.00813	296	2017-07-17	intergenic	ENSCAFG00000028029\x3bDNAJC22	dist\x3d34245\x3bdist\x3d12843	.	.	intergenic	CFRNASEQ_PROT_00101414\x3bDNAJC22	dist\x3d2522\x3bdist\x3d12287	.	.	intergenic	SPATS2\x3bDNAJC22	dist\x3d64532\x3bdist\x3d15118	.	.	upstream	RLOC_00023096_glncRNA	dist\x3d819	.	.	.	.	0.124306	0	FALSE	4998	FALSE	NA	0.186111	0	NA	0.063	2	0.004065	2 days, 6:49:00	0	0
GT:AD:DP:GQ:PGT:PID:PL	1/1:0,25:25:75:1|1:10251637_T_C:1125,75,0	chr27	10251640	NA	AGGAATGTGACTACT	A	43 days, 12:12:00	PASS	2	0.001818	658	2017-07-17	intergenic	TMEM117\x3bTWF1	dist\x3d4539\x3bdist\x3d29710	.	.	intergenic	TMEM117\x3bTWF1	dist\x3d4539\x3bdist\x3d29592	.	.	intergenic	TMEM117\x3bTWF1	dist\x3d5006\x3bdist\x3d29595	.	.	intronic	RLOC_00023195_protein_coding	.	.	.	Score\x3d278\x3bName\x3dlod\x3d18	.	NA	NA	FALSE	16418	FALSE	NA	0.0044	0	NA	5.45625	2	0.001815	60	0	NA
GT:AD:DP:GQ:PGT:PID:PL	1/1:0,2:2:6:1|1:12748562_TGATTGCA_T:90,6,0	chr27	12748562	NA	TGATTGCA	T	1 day, 5:39:00	NA	2	0.004	298	2017-07-17	intronic	CNTN1	.	.	.	intronic	CNTN1	.	.	.	intronic	CNTN1	.	.	.	intronic	RLOC_00023220_protein_coding	.	.	.	.	.	NA	NA	FALSE	5392	FALSE	NA	0.0044	0	NA	4.30347	1	0.002	2 days, 8:57:00	NA	NA
GT:AD:DP:GQ:PGT:PID:PL	1/1:0,2:2:6:1|1:12748562_TGATTGCA_T:90,6,0	chr27	12748574	NA	C	T	1 day, 14:54:00	NA	2	0.004	298	2017-07-17	intronic	CNTN1	.	.	.	intronic	CNTN1	.	.	.	intronic	CNTN1	.	.	.	intronic	RLOC_00023220_protein_coding	.	.	.	.	.	NA	NA	FALSE	5459	FALSE	NA	0.18125	0	NA	2.80208	1	0.002	2 days, 8:57:00	NA	NA
GT:AD:DP:GQ:PGT:PID:PL	1/1:0,26:26:78:1|1:12796916_C_T:1170,78,0	chr27	12796916	NA	C	T	47 days, 7:09:00	PASS	2	0.001815	658	2017-07-17	intronic	CNTN1	.	.	.	intronic	CNTN1	.	.	.	intronic	CNTN1	.	.	.	intronic	RLOC_00023220_protein_coding	.	.	.	.	.	NA	NA	FALSE	18386	FALSE	NA	0.0044	0	NA	5.41042	2	0.001812	60	0	NA
GT:AD:DP:GQ:PL	1/1:0,11:11:33:356,33,0	chr27	13085536	NA	C	T	11 days, 20:42:00	PASS	2	0.001815	658	2017-07-17	intergenic	ENSCAFG00000009888\x3bENSCAFG00000028502	dist\x3d11894\x3bdist\x3d23670	.	.	intergenic	CNTN1\x3bMUCSM_CANFA	dist\x3d80010\x3bdist\x3d23670	.	.	intergenic	CNTN1\x3bMUC19	dist\x3d80000\x3bdist\x3d23672	.	.	intergenic	RLOC_00023222_pseudogene\x3bRLOC_00023223_protein_coding	dist\x3d11894\x3bdist\x3d23670	.	.	.	.	NA	NA	FALSE	15045	FALSE	NA	0.0044	0	NA	4.7	2	0.001812	60	0	NA
GT:AD:DP:GQ:PGT:PID:PL	1/1:0,2:2:6:.:.:60,6,0	chr27	13271784	NA	C	G	2 days, 15:24:00	GATKstd	2	0.005882	626	2017-07-17	intergenic	ENSCAFG00000009900\x3bLRRK2	dist\x3d36560\x3bdist\x3d8711	.	.	intronic	LRRK2	.	.	.	intergenic	MUC19\x3bLRRK2	dist\x3d18278\x3bdist\x3d11040	.	.	intronic	RLOC_00023225_protein_coding	.	.	.	.	.	-0.108	0	FALSE	16992	FALSE	NA	0.922222	0.336111	NA	0.831944	2	0.001957	1 day, 22:06:00	0	0
GT:AD:DP:GQ:PL	1/1:0,13:13:39:421,39,0	chr27	13585093	NA	T	C	20 days, 11:09:00	PASS	2	0.002732	658	2017-07-17	intronic	SLC2A13	.	.	.	intronic	SLC2A13	.	.	.	intronic	SLC2A13	.	.	.	intronic	RLOC_00023227_protein_coding	.	.	.	.	.	0.439583	0.253472	FALSE	17239	FALSE	NA	0.0044	0	NA	6.10625	3	0.002727	60	0	0.253472
GT:AD:DP:GQ:PL	1/1:0,30:30:90:951,90,0	chr27	13624515	NA	A	G	36 days, 14:51:00	PASS	2	0.001812	658	2017-07-17	intronic	SLC2A13	.	.	.	intronic	SLC2A13	.	.	.	intronic	SLC2A13	.	.	.	intronic	RLOC_00023227_protein_coding	.	.	.	.	.	NA	NA	FALSE	16853	FALSE	NA	0.0044	0	NA	4.38611	2	0.001808	2 days, 10:09:00	0	NA
GT:AD:DP:GQ:PL	1/1:0,9:9:27:303,27,0	chr27	13681158	NA	C	T	9 days, 17:52:00	PASS	2	0.001828	654	2017-07-17	intronic	SLC2A13	.	.	.	intronic	SLC2A13	.	.	.	intronic	SLC2A13	.	.	.	intronic	RLOC_00023227_protein_coding	.	.	.	.	.	NA	NA	FALSE	13836	FALSE	NA	0.0044	0	NA	3.5375	1	0.0009124	60	0	NA
GT:AD:DP:GQ:PGT:PID:PL	1/1:0,1:1:3:.:.:45,3,0	chr27	14114212	NA	GAGA	G	40183.9	NA	2	00:01:00	226	2017-07-17	intergenic	ENSCAFG00000035950\x3bENSCAFG00000010036	dist\x3d28392\x3bdist\x3d10028	.	.	intergenic	ABCD2\x3bENSCAFG00000010036	dist\x3d29666\x3bdist\x3d10028	.	.	intergenic	ABCD2\x3bKIF21A	dist\x3d29851\x3bdist\x3d91765	.	.	intergenic	RLOC_00023232_protein_coding\x3bRLOC_00023233_TUCp	dist\x3d2240\x3bdist\x3d9465	.	.	.	.	0.067	0	FALSE	3522	FALSE	NA	0	0.610417	NA	3.78194	2	0.005102	06:21:00	0	0
GT:AD:DP:GQ:PGT:PID:PL	1/1:0,14:14:42:1|1:14253268_TC_T:617,42,0	chr27	14253268	NA	TC	T	2550.92	PASS	2	0.001972	604	2017-07-17	intergenic	ENSCAFG00000010036\x3bKIF21A	dist\x3d128513\x3bdist\x3d5403	.	.	intergenic	CFRNASEQ_PROT_00099336\x3bKIF21A	dist\x3d66954\x3bdist\x3d3788	.	.	intronic	KIF21A	.	.	.	intronic	RLOC_00023235_protein_coding	.	.	.	.	.	NA	NA	FALSE	15010	FALSE	NA	0.202778	0.606944	NA	1.58472	1	0.0009843	0.521528	0	NA
GT:AD:DP:GQ:PL	1/1:0,4:4:12:141,12,0	chr27	14837265	NA	TCCAAGCCCTAATCTTCTTAATCATG	T	74.89	NA	2	0.004032	298	2017-07-17	UTR3	CPNE8	ENSCAFT00000016572.3:c.*3182_*3206delCCAAGCCCTAATCTTCTTAATCATG	.	.	exonic	CPNE8	.	unknown	UNKNOWN	intronic	CPNE8	.	.	.	UTR3	RLOC_00023238_protein_coding	CPNE8_1:c.*3182_*3206delCCAAGCCCTAATCTTCTTAATCATG\x3bTCONS_00109879:c.*3322_*3346delCCAAGCCCTAATCTTCTTAATCATG\x3bTCONS_00109882:c.*3345_*3369delCCAAGCCCTAATCTTCTTAATCATG\x3bTCONS_00109881:c.*3182_*3206delCCAAGCCCTAATCTTCTTAATCATG\x3bTCONS_00109880:c.*3345_*3369delCCAAGCCCTAATCTTCTTAATCATG\x3bCPNE8_3:c.*3345_*3369delCCAAGCCCTAATCTTCTTAATCATG\x3bCPNE8_4:c.*3182_*3206delCCAAGCCCTAATCTTCTTAATCATG\x3b…	.	.	.	.	NA	NA	FALSE	4700	FALSE	NA	0.0916667	0	NA	1.22639	1	0.002016	50.81	NA	NA
GT:AD:DP:GQ:PL	1/1:0,24:24:71:775,71,0	chr27	14857346	NA	A	T	29 days, 6:45:00	PASS	2	0.001825	658	2017-07-17	intergenic	CPNE8\x3bENSCAFG00000033469	dist\x3d19911\x3bdist\x3d88616	.	.	intergenic	CPNE8\x3bENSCAFG00000010466	dist\x3d19911\x3bdist\x3d257860	.	.	intronic	CPNE8	.	.	.	intronic	RLOC_00023238_glncRNA\x3bRLOC_00023238_protein_coding	.	.	.	.	.	NA	NA	FALSE	17822	FALSE	NA	0.0044	0	NA	4.89236	2	0.001821	60	0	NA
GT:AD:DP:GQ:PL	1/1:0,13:13:48:719,48,0	chr27	14998558	NA	C	CTGTTT	316428	PASS	2	0.002747	658	2017-07-17	intergenic	ENSCAFG00000033469\x3bENSCAFG00000035118	dist\x3d21569\x3bdist\x3d29281	.	.	intergenic	CPNE8\x3bENSCAFG00000010466	dist\x3d161123\x3bdist\x3d116648	.	.	intergenic	CPNE8\x3bALG10	dist\x3d60088\x3bdist\x3d122769	.	.	intergenic	RLOC_00023238_protein_coding\x3bRLOC_00023241_snRNA	dist\x3d57930\x3bdist\x3d81505	.	.	.	.	00:16:00	0	FALSE	18754	FALSE	NA	0.0004	0.520139	NA	1.74375	3	0.002742	2 days, 11:29:00	0	0
GT:AD:DP:GQ:PGT:PID:PL	1/1:0,5:5:15:1|1:15109653_T_G:210,15,0	chr27	15109653	NA	T	G	8 days, 9:43:00	PASS	2	0.001825	656	2017-07-17	intergenic	ENSCAFG00000035118\x3bENSCAFG00000010466	dist\x3d24232\x3bdist\x3d12334	.	.	intergenic	CPNE8\x3bENSCAFG00000010466	dist\x3d272218\x3bdist\x3d5553	.	.	intergenic	CPNE8\x3bALG10	dist\x3d171183\x3bdist\x3d11674	.	.	intergenic	RLOC_00023241_snRNA\x3bRLOC_00023242_protein_coding	dist\x3d29479\x3bdist\x3d5553	.	.	.	.	0.126389	0	FALSE	15265	FALSE	NA	0.454861	0.695139	NA	2.15764	1	0.0009107	2 days, 2:48:00	0	-1.301
GT:AD:DP:GQ:PGT:PID:PL	1/1:0,4:4:15:1|1:15109653_T_G:210,15,0	chr27	15109655	NA	C	G	8 days, 9:42:00	PASS	2	0.001825	656	2017-07-17	intergenic	ENSCAFG00000035118\x3bENSCAFG00000010466	dist\x3d24234\x3bdist\x3d12332	.	.	intergenic	CPNE8\x3bENSCAFG00000010466	dist\x3d272220\x3bdist\x3d5551	.	.	intergenic	CPNE8\x3bALG10	dist\x3d171185\x3bdist\x3d11672	.	.	intergenic	RLOC_00023241_snRNA\x3bRLOC_00023242_protein_coding	dist\x3d29481\x3bdist\x3d5551	.	.	.	.	01:36:00	0	FALSE	15268	FALSE	NA	0.454861	0.470139	NA	2.23056	1	0.0009107	50.92	0	-1.339
GT:AD:DP:GQ:PGT:PID:PL	1/1:0,3:3:9:1|1:15109653_T_G:135,9,0	chr27	15109660	NA	C	T	146.76	PASS	2	0.001825	656	2017-07-17	intergenic	ENSCAFG00000035118\x3bENSCAFG00000010466	dist\x3d24239\x3bdist\x3d12327	.	.	intergenic	CPNE8\x3bENSCAFG00000010466	dist\x3d272225\x3bdist\x3d5546	.	.	intergenic	CPNE8\x3bALG10	dist\x3d171190\x3bdist\x3d11667	.	.	intergenic	RLOC_00023241_snRNA\x3bRLOC_00023242_protein_coding	dist\x3d29486\x3bdist\x3d5546	.	.	.	.	0.639583	0	FALSE	15307	FALSE	NA	0.301389	0	NA	2.46111	1	0.0009107	3 days, 7:33:00	0	-1.31
GT:AD:DP:GQ:PL	1/1:0,22:22:66:731,66,0	chr27	15148258	NA	T	C	27 days, 10:42:00	PASS	2	0.001818	658	2017-07-17	intergenic	ENSCAFG00000025522\x3bENSCAFG00000036006	dist\x3d8429\x3bdist\x3d104268	.	.	intergenic	ENSCAFG00000025522\x3bENSCAFG00000009899	dist\x3d8680\x3bdist\x3d58051	.	.	intergenic	ALG10\x3bLOC106557872	dist\x3d21029\x3bdist\x3d365382	.	.	intergenic	RLOC_00023243_protein_coding\x3bRLOC_00023244_glncRNA	dist\x3d8429\x3bdist\x3d58042	.	.	.	.	NA	NA	FALSE	17681	FALSE	NA	0.0044	0	NA	5.59444	2	0.001815	60	0	NA
GT:AD:DP:GQ:PL	1/1:0,17:17:51:568,51,0	chr27	15684122	NA	C	G	20 days, 15:51:00	PASS	2	0.001825	658	2017-07-17	intergenic	SYT10\x3bENSCAFG00000026194	dist\x3d29043\x3bdist\x3d140384	.	.	intergenic	SYT10\x3bPKP2	dist\x3d23088\x3bdist\x3d387510	.	.	intergenic	SYT10\x3bPKP2	dist\x3d26938\x3bdist\x3d339064	.	.	intergenic	RLOC_00023248_protein_coding\x3bRLOC_00023249_lincRNA	dist\x3d23088\x3bdist\x3d3790	.	.	.	.	NA	NA	FALSE	17451	FALSE	NA	0.0044	0	NA	4.725	2	0.001821	60	0	NA
GT:AD:DP:GQ:PGT:PID:PL	1/1:0,7:7:30:1|1:15709927_T_TAAATA:450,30,0	chr27	15709927	NA	T	TAAATA	12679.8	PASS	2	0.001873	636	2017-07-17	intergenic	SYT10\x3bENSCAFG00000026194	dist\x3d54848\x3bdist\x3d114579	.	.	intergenic	SYT10\x3bPKP2	dist\x3d48893\x3bdist\x3d361705	.	.	intergenic	SYT10\x3bPKP2	dist\x3d52743\x3bdist\x3d313259	.	.	intergenic	RLOC_00023250_lincRNA\x3bRLOC_00023251_snRNA	dist\x3d15066\x3bdist\x3d114579	.	.	.	.	0.023	0	FALSE	13157	FALSE	NA	0	3.024	NA	2.93403	2	0.001869	4 days, 3:36:00	0	-1.534
GT:AD:DP:GQ:PGT:PID:PL	1/1:0,18:18:54:1|1:15868784_C_CTG:788,54,0	chr27	15868784	NA	C	CTG	29 days, 20:31:00	PASS	2	0.001821	656	2017-07-17	intergenic	ENSCAFG00000026194\x3bENSCAFG00000037389	dist\x3d44172\x3bdist\x3d62734	.	.	intergenic	SYT10\x3bPKP2	dist\x3d207750\x3bdist\x3d202848	.	.	intergenic	SYT10\x3bPKP2	dist\x3d211600\x3bdist\x3d154402	.	.	intergenic	RLOC_00023251_snRNA\x3bRLOC_00023252_protein_coding	dist\x3d44172\x3bdist\x3d154353	.	.	.	.	NA	NA	FALSE	15851	FALSE	NA	0.302778	0.206944	NA	1.91319	2	0.001818	2 days, 10:04:00	0	NA
GT:AD:DP:GQ:PL	1/1:0,19:19:57:574,57,0	chr27	16555187	NA	T	C	20 days, 21:52:00	PASS	2	0.001815	658	2017-07-17	intronic	BICD1	.	.	.	intronic	BICD1	.	.	.	intronic	BICD1	.	.	.	intronic	RLOC_00023260_protein_coding	.	.	.	.	.	NA	NA	FALSE	17370	FALSE	NA	0.0909722	0	NA	4.425	2	0.001812	60	0	NA
GT:AD:DP:GQ:PGT:PID:PL	1/1:0,19:19:57:.:.:738,57,0	chr27	17068966	NA	TAAAA	T	80013.6	NA	2	0.015	272	2017-07-17	ncRNA_intronic	ENSCAFG00000040806	.	.	.	intergenic	KIAA1551\x3bAMN1	dist\x3d217620\x3bdist\x3d8726	.	.	intronic	AMN1	.	.	.	intronic	RLOC_00023264_protein_coding	.	.	.	.	.	00:29:00	0	FALSE	3630	FALSE	NA	3.89028	0.677778	NA	0.0826389	6	0.013	33.94	NA	-0.589
GT:AD:DP:GQ:PGT:PID:PL	1/1:0,2:2:6:1|1:17729943_A_T:66,6,0	chr27	17729943	NA	A	T	16:48:00	NA	2	0.004016	298	2017-07-17	intergenic	ENSCAFG00000010802\x3bENSCAFG00000037355	dist\x3d25224\x3bdist\x3d62387	.	.	intergenic	IPO8\x3bTMTC1	dist\x3d89222\x3bdist\x3d522523	.	.	intergenic	IPO8\x3bTMTC1	dist\x3d89224\x3bdist\x3d522699	.	.	intergenic	RLOC_00023278_pseudogene\x3bRLOC_00023279_misc_RNA	dist\x3d25224\x3bdist\x3d484140	.	.	.	.	NA	NA	FALSE	4745	FALSE	NA	2.49931	0	NA	-0.0002	1	0.002008	2 days, 17:19:00	NA	NA
GT:AD:DP:GQ:PGT:PID:PL	1/1:0,1:1:6:1|1:17729943_A_T:66,6,0	chr27	17729944	NA	A	T	16:04:00	NA	2	0.004016	298	2017-07-17	intergenic	ENSCAFG00000010802\x3bENSCAFG00000037355	dist\x3d25225\x3bdist\x3d62386	.	.	intergenic	IPO8\x3bTMTC1	dist\x3d89223\x3bdist\x3d522522	.	.	intergenic	IPO8\x3bTMTC1	dist\x3d89225\x3bdist\x3d522698	.	.	intergenic	RLOC_00023278_pseudogene\x3bRLOC_00023279_misc_RNA	dist\x3d25225\x3bdist\x3d484139	.	.	.	.	NA	NA	FALSE	4775	FALSE	NA	3.75139	0	NA	0.025	1	0.002008	60	NA	NA
GT:AD:DP:GQ:PL	1/1:0,2:2:6:51,6,0	chr27	17917473	NA	C	T	280.88	GATKstd	2	0.095	44	2017-07-17	intergenic	ENSCAFG00000037355\x3bENSCAFG00000036238	dist\x3d119055\x3bdist\x3d163788	.	.	intergenic	IPO8\x3bTMTC1	dist\x3d276752\x3bdist\x3d334993	.	.	intergenic	IPO8\x3bTMTC1	dist\x3d276754\x3bdist\x3d335169	.	.	intergenic	RLOC_00023278_pseudogene\x3bRLOC_00023279_misc_RNA	dist\x3d212754\x3bdist\x3d296610	.	.	.	.	0	0	FALSE	172	FALSE	NA	0.434028	0	NA	0.611806	11	0.095	12:12:00	0	0.671528
GT:AD:DP:GQ:PGT:PID:PL	1/1:0,3:3:9:1|1:17962781_T_G:99,9,0	chr27	17962781	NA	T	G	1 day, 21:34:00	NA	2	0.004082	296	2017-07-17	intergenic	ENSCAFG00000037355\x3bENSCAFG00000036238	dist\x3d164363\x3bdist\x3d118480	.	.	intergenic	IPO8\x3bTMTC1	dist\x3d322060\x3bdist\x3d289685	.	.	intergenic	IPO8\x3bTMTC1	dist\x3d322062\x3bdist\x3d289861	.	.	intergenic	RLOC_00023278_pseudogene\x3bRLOC_00023279_misc_RNA	dist\x3d258062\x3bdist\x3d251302	.	.	.	.	NA	NA	FALSE	5172	FALSE	NA	4.23056	0	NA	0.669444	1	0.002041	12:25:00	NA	NA
GT:AD:DP:GQ:PGT:PID:PL	1/1:0,5:5:18:1|1:19421651_C_A:229,18,0	chr27	19421708	NA	ACCATGAG	A	18 days, 19:39:00	NA	2	00:05:00	4	2017-07-17	intronic	CCDC91	.	.	.	intergenic	CFRNASEQ_PROT_00101826\x3bCFRNASEQ_PROT_00101846	dist\x3d197272\x3bdist\x3d116155	.	.	intronic	CCDC91	.	.	.	intronic	RLOC_00023292_protein_coding	.	.	.	.	.	NA	NA	FALSE	4357	FALSE	NA	0.196528	0	NA	NA	2	00:05:00	03:16:00	NA	NA
GT:AD:DP:GQ:PGT:PID:PL	1/1:0,5:5:18:1|1:19421651_C_A:229,18,0	chr27	19421710	NA	C	*	19 days, 4:45:00	NA	2	00:05:00	4	2017-07-17	intronic	CCDC91	.	.	.	intergenic	CFRNASEQ_PROT_00101826\x3bCFRNASEQ_PROT_00101846	dist\x3d197273\x3bdist\x3d116160	.	.	intronic	CCDC91	.	.	.	intronic	RLOC_00023292_protein_coding	.	.	.	.	.	NA	NA	FALSE	4354	FALSE	NA	0.196528	0	NA	NA	2	00:05:00	0.1	NA	NA
GT:AD:DP:GQ:PGT:PID:PL	1/1:0,5:5:18:1|1:19421651_C_A:229,18,0	chr27	19421712	NA	T	*	363.63	NA	2	00:05:00	4	2017-07-17	intronic	CCDC91	.	.	.	intergenic	CFRNASEQ_PROT_00101826\x3bCFRNASEQ_PROT_00101846	dist\x3d197275\x3bdist\x3d116158	.	.	intronic	CCDC91	.	.	.	intronic	RLOC_00023292_protein_coding	.	.	.	.	.	NA	NA	FALSE	4346	FALSE	NA	0.196528	0	NA	NA	2	00:05:00	0.0840278	NA	NA
GT:AD:DP:GQ:PGT:PID:PL	1/1:0,5:5:18:1|1:19421651_C_A:229,18,0	chr27	19421715	NA	G	*	318.83	NA	2	00:05:00	4	2017-07-17	intronic	CCDC91	.	.	.	intergenic	CFRNASEQ_PROT_00101826\x3bCFRNASEQ_PROT_00101846	dist\x3d197278\x3bdist\x3d116155	.	.	intronic	CCDC91	.	.	.	intronic	RLOC_00023292_protein_coding	.	.	.	.	.	NA	NA	FALSE	4364	FALSE	NA	0.196528	0	NA	NA	2	00:05:00	01:06:00	NA	NA
GT:AD:DP:GQ:PGT:PID:PL	1/1:0,8:8:24:.:.:360,24,0	chr27	20033159	NA	C	*	397742	PASS	2	0.001818	658	2017-07-17	intronic	PPFIBP1	.	.	.	intronic	PPFIBP1	.	.	.	intronic	PPFIBP1	.	.	.	intronic	RLOC_00023305_protein_coding	.	.	.	.	.	02:32:00	0	FALSE	17710	FALSE	NA	2.73681	0	NA	0.094	1	0.0009074	58.89	0	0
GT:AD:DP:GQ:PGT:PID:PL	1/1:0,7:7:21:1|1:24901182_T_C:315,21,0	chr27	24901199	NA	C	CTTTTCCTT	4451.62	NA	2	0.005525	216	2017-07-17	intronic	ST8SIA1	.	.	.	intronic	ST8SIA1	.	.	.	intronic	ST8SIA1	.	.	.	intronic	RLOC_00023350_protein_coding	.	.	.	.	.	0.175694	0	FALSE	2998	FALSE	NA	0	1.03056	NA	3.25625	1	0.002762	20:47:00	NA	-0.431
GT:AD:DP:GQ:PL	1/1:0,20:20:60:651,60,0	chr27	24968121	NA	G	A	11740.2	PASS	2	0.002722	658	2017-07-17	intronic	ST8SIA1	.	.	.	intronic	ST8SIA1	.	.	.	intronic	ST8SIA1	.	.	.	intronic	RLOC_00023350_protein_coding	.	.	.	.	.	03:04:00	-1.377	FALSE	16258	FALSE	NA	0.0086	04:02:00	NA	2.25764	3	0.002717	0.75625	0	-0.775
GT:AD:DP:GQ:PL	1/1:0,25:25:75:772,75,0	chr27	25014174	NA	A	C	29 days, 3:47:00	PASS	2	0.001821	658	2017-07-17	intronic	ST8SIA1	.	.	.	intronic	ST8SIA1	.	.	.	intronic	ST8SIA1	.	.	.	intronic	RLOC_00023350_protein_coding	.	.	.	.	.	NA	NA	FALSE	17571	FALSE	NA	0.0044	0	NA	4.99444	2	0.001818	60	0	NA
GT:AD:DP:GQ:PL	1/1:0,27:27:80:790,80,0	chr27	25024783	NA	G	A	44 days, 4:47:00	PASS	2	0.002727	658	2017-07-17	intergenic	ST8SIA1\x3bENSCAFG00000011854	dist\x3d5911\x3bdist\x3d36062	.	.	exonic	ST8SIA1	.	unknown	UNKNOWN	UTR3	ST8SIA1	XM_534865.6:c.*5911G>A	.	.	UTR3	RLOC_00023350_protein_coding	TCONS_00110242:c.*1664G>A\x3bTCONS_00110244:c.*5911G>A\x3bST8SIA1_1:c.*5911G>A\x3bTCONS_00110249:c.*5911G>A\x3bST8SIA1_4:c.*5911G>A\x3bTCONS_00110248:c.*1723G>A	.	.	.	.	0.0909722	-0.843	FALSE	18501	FALSE	NA	0.0044	0	NA	5.38403	3	0.002722	60	0	0.0944444
GT:AD:DP:GQ:PGT:PID:PL	1/1:0,16:16:48:.:.:517,48,0	chr27	25067715	NA	C	T	107 days, 18:18:00	PASS	2	0.016	658	2017-07-17	exonic	ENSCAFG00000011854	.	synonymous_SNV	ENSCAFG00000011854:ENSCAFT00000049458.2:exon3:c.366C>T:p.A122A,ENSCAFG00000011854:ENSCAFT00000018826.3:exon4:c.372C>T:p.A124A	exonic	ENSCAFG00000011854	.	unknown	UNKNOWN	exonic	LOC102151402	.	synonymous_SNV	LOC102151402:XM_014108307.2:exon3:c.366C>T:p.A122A	exonic	RLOC_00023351_protein_coding	.	synonymous_SNV	RLOC_00023351_protein_coding:ENSCAFG00000011854_1:exon3:c.366C>T:p.A122A,RLOC_00023351_protein_coding:ENSCAFG00000011854_2:exon4:c.372C>T:p.A124A,RLOC_00023351_protein_coding:TCONS_00110252:exon4:c.372C>T:p.A124A	Score\x3d355\x3bName\x3dlod\x3d37	.	0.145139	0.369444	FALSE	21720	FALSE	NA	0.0044	0.378472	NA	4.72639	3	0.016	77	0	0.105556
GT:AD:DP:GQ:PL	1/1:0,29:29:87:987,87,0	chr27	25145391	NA	C	T	38 days, 2:47:00	PASS	2	0.001818	658	2017-07-17	intergenic	CMAS\x3bABCC9	dist\x3d28372\x3bdist\x3d55579	.	.	intergenic	CMAS\x3bKCNJ8	dist\x3d28268\x3bdist\x3d121414	.	.	intergenic	CMAS\x3bABCC9	dist\x3d28390\x3bdist\x3d54189	.	.	intergenic	RLOC_00023353_protein_coding\x3bRLOC_00023354_protein_coding	dist\x3d28268\x3bdist\x3d54158	.	.	.	.	NA	NA	FALSE	17113	FALSE	NA	0.0044	0	NA	5.02569	2	0.001815	2 days, 10:03:00	0	NA
GT:AD:DP:GQ:PL	1/1:0,31:31:93:1048,93,0	chr27	25158066	NA	T	A	40 days, 15:43:00	PASS	2	0.001818	658	2017-07-17	intergenic	CMAS\x3bABCC9	dist\x3d41047\x3bdist\x3d42904	.	.	intergenic	CMAS\x3bKCNJ8	dist\x3d40943\x3bdist\x3d108739	.	.	intergenic	CMAS\x3bABCC9	dist\x3d41065\x3bdist\x3d41514	.	.	intergenic	RLOC_00023353_protein_coding\x3bRLOC_00023354_protein_coding	dist\x3d40943\x3bdist\x3d41483	.	.	.	.	NA	NA	FALSE	17613	FALSE	NA	0.0044	0	NA	5.42153	2	0.001815	60	0	NA
GT:AD:DP:GQ:PL	1/1:0,15:15:45:675,45,0	chr27	25204005	NA	ATAAC	A	24 days, 17:46:00	PASS	2	0.001815	658	2017-07-17	intronic	ABCC9	.	.	.	intergenic	CMAS\x3bKCNJ8	dist\x3d86883\x3bdist\x3d62796	.	.	intronic	ABCC9	.	.	.	intronic	RLOC_00023354_protein_coding	.	.	.	.	.	NA	NA	FALSE	16480	FALSE	NA	0.0044	0	NA	5.20417	2	0.001812	60	0	NA
GT:AD:DP:GQ:PGT:PID:PL	1/1:0,6:6:18:1|1:25272155_A_AAGAAAGGAAAGGAAGAGAAGAGAAAAAGAAAGGAAGGAAGGGAGGAAGGAAGGG:270,18,0	chr27	25272171	NA	A	*	53168	NA	2	0.004808	252	2017-07-17	intronic	ABCC9	.	.	.	intronic	KCNJ8	.	.	.	intronic	ABCC9	.	.	.	intronic	RLOC_00023354_protein_coding	.	.	.	.	.	-1.393	0	FALSE	3821	FALSE	NA	0	0.433333	NA	2.97569	1	0.002404	47.76	0	-0.152
GT:AD:DP:GQ:PL	1/1:0,26:26:78:1086,78,0	chr27	25281254	NA	C	CAT	41 days, 20:37:00	PASS	2	0.001815	656	2017-07-17	intronic	ABCC9	.	.	.	intronic	KCNJ8	.	.	.	intronic	ABCC9	.	.	.	intronic	RLOC_00023354_protein_coding	.	.	.	.	.	NA	NA	FALSE	17777	FALSE	NA	0.0044	0	NA	5.50069	2	0.001812	2 days, 13:24:00	0	NA
GT:AD:DP:GQ:PL	1/1:0,13:13:39:448,39,0	chr27	25369000	NA	C	A	15 days, 15:09:00	PASS	2	0.001869	642	2017-07-17	intronic	ABCC9\x3bKCNJ8	.	.	.	intergenic	KCNJ8\x3bLDHB	dist\x3d15824\x3bdist\x3d104222	.	.	intronic	KCNJ8	.	.	.	intronic	RLOC_00023354_protein_coding	.	.	.	.	.	NA	NA	FALSE	12180	FALSE	NA	0.0044	0	NA	3.52569	2	0.001866	60	0	NA
GT:AD:DP:GQ:PGT:PID:PL	1/1:0,15:15:48:1|1:25776916_CA_C:720,48,0	chr27	25776916	NA	CA	C	110962	NA	2	0.004444	276	2017-07-17	intergenic	ENSCAFG00000025589\x3bENSCAFG00000016278	dist\x3d63092\x3bdist\x3d3186	.	.	intronic	ENSCAFG00000016278	.	.	.	intergenic	LOC106557533\x3bLOC100687078	dist\x3d63592\x3bdist\x3d355030	.	.	intronic	RLOC_00023368_protein_coding	.	.	.	.	.	0.101389	0	FALSE	3800	FALSE	NA	2.33611	0.267361	NA	0.765972	2	0.004444	0.884722	0	0
GT:AD:DP:GQ:PL	1/1:0,25:25:75:827,75,0	chr27	26052236	NA	C	A	31 days, 10:46:00	PASS	2	0.001818	658	2017-07-17	intergenic	ENSCAFG00000012292\x3bENSCAFG00000033750	dist\x3d2387\x3bdist\x3d79692	.	.	intergenic	ENSCAFG00000024414\x3bENSCAFG00000029531	dist\x3d14690\x3bdist\x3d79645	.	.	intergenic	LOC106557533\x3bLOC100687078	dist\x3d338911\x3bdist\x3d79711	.	.	intergenic	RLOC_00023378_protein_coding\x3bRLOC_00023379_protein_coding	dist\x3d2387\x3bdist\x3d25212	.	.	.	.	NA	NA	FALSE	16356	FALSE	NA	0.0044	0	NA	5.45625	2	0.001815	60	0	NA
GT:AD:DP:GQ:PL	1/1:0,22:22:66:743,66,0	chr27	26282141	NA	C	T	27 days, 22:41:00	PASS	2	0.001818	658	2017-07-17	intergenic	ENSCAFG00000013746\x3bIAPP	dist\x3d11979\x3bdist\x3d12498	.	.	intronic	Q8HYR2_CANFA	.	.	.	intronic	SLCO1A2	.	.	.	intronic	RLOC_00023391_protein_coding	.	.	.	.	.	NA	NA	FALSE	16349	FALSE	NA	0.0044	0	NA	6.17917	2	0.001815	60	0	NA
GT:AD:DP:GQ:PGT:PID:PL	1/1:0,23:23:72:1|1:26739043_T_C:1030,72,0	chr27	26739043	NA	T	C	39 days, 21:41:00	PASS	2	0.001815	658	2017-07-17	ncRNA_intronic	ENSCAFG00000034425	.	.	.	intronic	PDE3A	.	.	.	intronic	PDE3A	.	.	.	intronic	RLOC_00023397_protein_coding	.	.	.	.	.	NA	NA	FALSE	18097	FALSE	NA	0.0044	0	NA	0.617361	2	0.001812	60	0	NA
GT:AD:DP:GQ:PL	1/1:0,22:22:66:802,66,0	chr27	26805831	NA	A	AAC	30 days, 0:47:00	PASS	2	0.001818	654	2017-07-17	intronic	PDE3A	.	.	.	intronic	PDE3A	.	.	.	intronic	PDE3A	.	.	.	intronic	RLOC_00023397_protein_coding	.	.	.	.	.	NA	NA	FALSE	16514	FALSE	NA	0.0044	0	NA	4.52361	2	0.001815	39.73	0	NA
GT:AD:DP:GQ:PL	1/1:0,14:14:41:424,41,0	chr27	26832514	NA	G	A	351.68	PASS	2	0.001828	654	2017-07-17	intronic	PDE3A	.	.	.	intronic	PDE3A	.	.	.	intronic	PDE3A	.	.	.	intronic	RLOC_00023397_protein_coding	.	.	.	.	.	NA	NA	FALSE	14518	FALSE	NA	0.0044	0	NA	3.73403	2	0.001825	59.66	0	NA
GT:AD:DP:GQ:PL	1/1:0,24:24:72:646,72,0	chr27	27021923	NA	C	CT	33 days, 19:28:00	PASS	2	0.003636	658	2017-07-17	intergenic	ENSCAFG00000025893\x3bENSCAFG00000035292	dist\x3d2781\x3bdist\x3d187377	.	.	intergenic	PDE3A\x3bENSCAFG00000030449	dist\x3d141971\x3bdist\x3d492485	.	.	intergenic	PDE3A\x3bAEBP2	dist\x3d143299\x3bdist\x3d632218	.	.	intergenic	RLOC_00023401_snRNA\x3bRLOC_00023402_protein_coding	dist\x3d2781\x3bdist\x3d492485	.	.	.	.	0.513194	0.05	FALSE	16854	FALSE	NA	0.0044	0	NA	4.95069	4	0.00363	60	0	0.05
GT:AD:DP:GQ:PL	1/1:0,17:17:51:586,51,0	chr27	27274503	NA	A	G	21 days, 9:47:00	PASS	2	0.001818	658	2017-07-17	intergenic	ENSCAFG00000035292\x3bENSCAFG00000034302	dist\x3d28860\x3bdist\x3d231392	.	.	intergenic	PDE3A\x3bENSCAFG00000030449	dist\x3d394551\x3bdist\x3d239905	.	.	intergenic	PDE3A\x3bAEBP2	dist\x3d395879\x3bdist\x3d379638	.	.	intergenic	RLOC_00023401_snRNA\x3bRLOC_00023402_protein_coding	dist\x3d255361\x3bdist\x3d239905	.	.	.	.	NA	NA	FALSE	16254	FALSE	NA	0.0044	0	NA	0.460417	2	0.001815	60	0	NA
GT:AD:DP:GQ:PL	1/1:0,2:2:6:59,6,0	chr27	27458909	NA	A	G	10:16:00	NA	2	0.005076	224	2017-07-17	intergenic	ENSCAFG00000035292\x3bENSCAFG00000034302	dist\x3d213266\x3bdist\x3d46986	.	.	intergenic	PDE3A\x3bENSCAFG00000030449	dist\x3d578957\x3bdist\x3d55499	.	.	intergenic	PDE3A\x3bAEBP2	dist\x3d580285\x3bdist\x3d195232	.	.	intergenic	RLOC_00023401_snRNA\x3bRLOC_00023402_protein_coding	dist\x3d439767\x3bdist\x3d55499	.	.	.	.	NA	NA	FALSE	1793	FALSE	NA	0.232639	0	NA	0.4	1	0.002538	1 day, 8:25:00	NA	NA
GT:AD:DP:GQ:PL	1/1:1,20:21:29:609,29,0	chr27	27472958	NA	C	T	22 days, 10:56:00	PASS	2	0.001818	658	2017-07-17	intergenic	ENSCAFG00000035292\x3bENSCAFG00000034302	dist\x3d227315\x3bdist\x3d32937	.	.	intergenic	PDE3A\x3bENSCAFG00000030449	dist\x3d593006\x3bdist\x3d41450	.	.	intergenic	PDE3A\x3bAEBP2	dist\x3d594334\x3bdist\x3d181183	.	.	intergenic	RLOC_00023401_snRNA\x3bRLOC_00023402_protein_coding	dist\x3d453816\x3bdist\x3d41450	.	.	.	.	0.240972	0	FALSE	16452	FALSE	NA	0.0044	0.172222	NA	4.92847	1	0.0009074	53.96	0	-0.804
GT:AD:DP:GQ:PGT:PID:PL	1/1:0,4:4:12:.:.:161,12,0	chr27	27607588	NA	AAAATAAATAAATAAAT	A	154184	PASS	2	0.004735	640	2017-07-17	ncRNA_intronic	ENSCAFG00000034302	.	.	.	intergenic	ENSCAFG00000030449\x3bAEBP2	dist\x3d90666\x3bdist\x3d39657	.	.	intergenic	PDE3A\x3bAEBP2	dist\x3d728965\x3bdist\x3d46537	.	.	intergenic	RLOC_00023402_protein_coding\x3bRLOC_00023403_protein_coding	dist\x3d90666\x3bdist\x3d20372	.	.	.	.	-0.2	0	FALSE	11429	FALSE	NA	7.18403	0.714583	NA	0.109028	4	0.003781	57.97	0	0
GT:AD:DP:GQ:PGT:PID:PL	1/1:0,15:15:45:1|1:27623647_G_C:646,45,0	chr27	27623647	NA	G	C	23 days, 23:51:00	GATKstd	2	0.002667	486	2017-07-17	ncRNA_intronic	ENSCAFG00000034302	.	.	.	intergenic	ENSCAFG00000030449\x3bAEBP2	dist\x3d106724\x3bdist\x3d23614	.	.	intergenic	PDE3A\x3bAEBP2	dist\x3d745023\x3bdist\x3d30494	.	.	intergenic	RLOC_00023402_protein_coding\x3bRLOC_00023403_protein_coding	dist\x3d106724\x3bdist\x3d4329	.	.	.	.	-0.434	-1.085	FALSE	7331	FALSE	NA	0.197222	0	NA	0.638194	1	0.00133	40.84	0	01:03:00
GT:AD:DP:GQ:PL	1/1:0,14:14:41:408,41,0	chr27	27711635	NA	C	T	385.68	PASS	2	0.001825	658	2017-07-17	intronic	AEBP2	.	.	.	intronic	AEBP2	.	.	.	intronic	AEBP2	.	.	.	intronic	RLOC_00023403_protein_coding	.	.	.	.	.	0.406944	0	FALSE	14451	FALSE	NA	0.065	0	NA	2.11042	2	0.001821	60	0	0
GT:AD:DP:GQ:PL	1/1:0,16:16:48:517,48,0	chr27	27747588	NA	G	A	444.72	PASS	2	0.001825	656	2017-07-17	intergenic	AEBP2\x3bENSCAFG00000033995	dist\x3d25097\x3bdist\x3d9257	.	.	intergenic	AEBP2\x3bPLEKHA5	dist\x3d25097\x3bdist\x3d32097	.	.	intergenic	AEBP2\x3bPLEKHA5	dist\x3d24666\x3bdist\x3d29516	.	.	intergenic	RLOC_00023403_protein_coding\x3bRLOC_00023404_snRNA	dist\x3d25097\x3bdist\x3d26798	.	.	.	.	NA	NA	FALSE	13748	FALSE	NA	0.026	0	NA	2.44028	2	0.001821	60	0	NA
GT:AD:DP:GQ:PL	1/1:0,24:24:71:775,71,0	chr27	27764009	NA	C	T	29 days, 6:53:00	PASS	2	0.001825	658	2017-07-17	ncRNA_intronic	ENSCAFG00000033995	.	.	.	intergenic	AEBP2\x3bPLEKHA5	dist\x3d41518\x3bdist\x3d15676	.	.	intergenic	AEBP2\x3bPLEKHA5	dist\x3d41087\x3bdist\x3d13095	.	.	intergenic	RLOC_00023403_protein_coding\x3bRLOC_00023404_snRNA	dist\x3d41518\x3bdist\x3d10377	.	.	.	.	NA	NA	FALSE	15951	FALSE	NA	0.0044	0	NA	3.91806	2	0.001821	57.65	0	NA
GT:AD:DP:GQ:PL	1/1:0,18:18:54:649,54,0	chr27	27789927	NA	CA	C	23 days, 16:01:00	PASS	2	0.001825	658	2017-07-17	ncRNA_intronic	ENSCAFG00000033995	.	.	.	intronic	PLEKHA5	.	.	.	intronic	PLEKHA5	.	.	.	intronic	RLOC_00023405_protein_coding	.	.	.	.	.	NA	NA	FALSE	16889	FALSE	NA	0.0044	0	NA	4.21042	2	0.001821	2 days, 9:07:00	0	NA
GT:AD:DP:GQ:PL	1/1:0,21:21:62:632,62,0	chr27	27836777	NA	A	G	23 days, 8:26:00	PASS	2	0.001838	656	2017-07-17	ncRNA_intronic	ENSCAFG00000033995	.	.	.	intronic	PLEKHA5	.	.	.	intronic	PLEKHA5	.	.	.	intronic	RLOC_00023405_protein_coding	.	.	.	.	.	NA	NA	FALSE	11296	FALSE	NA	1.09444	0	NA	1.04931	2	0.001835	60	0	NA
GT:AD:DP:GQ:PGT:PID:PL	1/1:0,5:5:18:1|1:27861387_TTTC_T:225,18,0	chr27	27861399	NA	TTCTTTCTTTCCTTCCTTCCTTCCTTCCTTCCTTTCTTTCTTTCTTTCTTTCTTTCTTTCTTTCTTTCTTTC	T	2253	NA	2	0.007692	228	2017-07-17	ncRNA_intronic	ENSCAFG00000033995	.	.	.	intronic	PLEKHA5	.	.	.	intronic	PLEKHA5	.	.	.	intronic	RLOC_00023405_protein_coding	.	.	.	.	.	-1.807	0	FALSE	2809	FALSE	NA	0.0011	0	NA	1.31458	2	0.005128	0.420833	NA	-2.362
GT:AD:DP:GQ:PGT:PID:PL	1/1:0,4:4:12:.:.:180,12,0	chr27	27861550	NA	C	CCCTTCCTT	294 days, 17:13:00	NA	2	0.035	58	2017-07-17	ncRNA_intronic	ENSCAFG00000033995	.	.	.	intronic	PLEKHA5	.	.	.	intronic	PLEKHA5	.	.	.	intronic	RLOC_00023405_protein_coding	.	.	.	.	.	01:15:00	0	FALSE	797	FALSE	NA	0	0.519444	NA	5.02986	2	0.018	1 day, 4:27:00	NA	0
GT:AD:DP:GQ:PL	1/1:0,18:18:54:527,54,0	chr27	27868508	NA	TC	T	4670.75	PASS	2	0.014	142	2017-07-17	ncRNA_intronic	ENSCAFG00000033995	.	.	.	intronic	PLEKHA5	.	.	.	intronic	PLEKHA5	.	.	.	intronic	RLOC_00023405_protein_coding	.	.	.	.	.	NA	NA	FALSE	9275	FALSE	NA	0.485417	0	NA	-0.1353	3	00:02:00	05:44:00	0	NA
GT:AD:DP:GQ:PL	1/1:0,14:14:42:436,42,0	chr27	27915870	NA	C	G	363.74	PASS	2	0.001828	658	2017-07-17	intronic	PLEKHA5	.	.	.	intronic	PLEKHA5	.	.	.	intronic	PLEKHA5	.	.	.	intronic	RLOC_00023405_protein_coding	.	.	.	.	.	NA	NA	FALSE	15047	FALSE	NA	0.18125	0	NA	3.19931	2	0.001825	1 day, 18:43:00	0	NA
GT:AD:DP:GQ:PL	1/1:0,18:18:54:587,54,0	chr27	27929861	NA	G	A	21 days, 10:59:00	PASS	2	0.001832	648	2017-07-17	intronic	PLEKHA5	.	.	.	intronic	PLEKHA5	.	.	.	intronic	PLEKHA5	.	.	.	intronic	RLOC_00023405_protein_coding	.	.	.	.	.	NA	NA	FALSE	14782	FALSE	NA	0.0044	0	NA	3.44931	2	0.001828	59.95	0	NA
GT:AD:DP:GQ:PGT:PID:PL	1/1:0,2:2:6:1|1:27960205_C_CT:90,6,0	chr27	27960209	NA	C	G	123 days, 0:49:00	NA	2	0.039	50	2017-07-17	intronic	PLEKHA5	.	.	.	intronic	PLEKHA5	.	.	.	intronic	PLEKHA5	.	.	.	intronic	RLOC_00023405_protein_coding	.	.	.	.	.	-0.524	0	FALSE	429	FALSE	NA	2.70278	1.18264	NA	3.44792	2	0.026	2 days, 0:02:00	NA	01:04:00
GT:AD:DP:GQ:PGT:PID:PL	1/1:0,8:8:24:.:.:253,24,0	chr27	28041014	NA	C	T	11786.1	PASS	2	0.001838	652	2017-07-17	intergenic	PLEKHA5\x3bCAPZA3	dist\x3d17031\x3bdist\x3d321106	.	.	intergenic	PLEKHA5\x3bCAPZA3	dist\x3d17031\x3bdist\x3d321106	.	.	intergenic	PLEKHA5\x3bCAPZA3	dist\x3d17139\x3bdist\x3d321089	.	.	ncRNA_intronic	RLOC_00023406_antisense_mRNA	.	.	.	.	.	0.436111	0	FALSE	14734	FALSE	NA	0.0001	0.281944	NA	2.24167	1	0.0009174	42.69	0	0
GT:AD:DP:GQ:PL	1/1:0,14:14:42:457,42,0	chr27	28127365	NA	C	T	384.61	PASS	2	0.001821	658	2017-07-17	intergenic	PLEKHA5\x3bCAPZA3	dist\x3d103382\x3bdist\x3d234755	.	.	intergenic	PLEKHA5\x3bCAPZA3	dist\x3d103382\x3bdist\x3d234755	.	.	intergenic	PLEKHA5\x3bCAPZA3	dist\x3d103490\x3bdist\x3d234738	.	.	ncRNA_intronic	RLOC_00023406_lincRNA	.	.	.	.	.	NA	NA	FALSE	16927	FALSE	NA	0.0044	0	NA	4.97708	2	0.001818	60	0	NA
GT:AD:DP:GQ:PL	1/1:0,12:12:36:394,36,0	chr27	28189230	NA	A	G	322	PASS	2	0.001818	658	2017-07-17	intergenic	PLEKHA5\x3bCAPZA3	dist\x3d165247\x3bdist\x3d172890	.	.	intergenic	PLEKHA5\x3bCAPZA3	dist\x3d165247\x3bdist\x3d172890	.	.	intergenic	PLEKHA5\x3bCAPZA3	dist\x3d165355\x3bdist\x3d172873	.	.	intergenic	RLOC_00023406_lincRNA\x3bRLOC_00023407_protein_coding	dist\x3d4314\x3bdist\x3d172890	.	.	.	.	NA	NA	FALSE	15178	FALSE	NA	0.013	0	NA	4.19097	2	0.001815	60	0	NA
GT:AD:DP:GQ:PGT:PID:PL	1/1:0,20:20:63:1|1:28222729_T_G:881,63,0	chr27	28222729	NA	T	G	82 days, 16:17:00	PASS	2	0.003745	636	2017-07-17	intergenic	PLEKHA5\x3bCAPZA3	dist\x3d198746\x3bdist\x3d139391	.	.	intergenic	PLEKHA5\x3bCAPZA3	dist\x3d198746\x3bdist\x3d139391	.	.	intergenic	PLEKHA5\x3bCAPZA3	dist\x3d198854\x3bdist\x3d139374	.	.	intergenic	RLOC_00023406_lincRNA\x3bRLOC_00023407_protein_coding	dist\x3d37813\x3bdist\x3d139391	.	.	.	.	NA	NA	FALSE	13883	FALSE	NA	0.0045	0	NA	3.53611	4	0.003738	1 day, 18:05:00	0	NA
GT:AD:DP:GQ:PL	1/1:0,2:2:6:67,6,0	chr27	28320410	NA	T	C	0.672222	NA	2	0.004016	298	2017-07-17	intergenic	PLEKHA5\x3bCAPZA3	dist\x3d296427\x3bdist\x3d41710	.	.	intergenic	PLEKHA5\x3bCAPZA3	dist\x3d296427\x3bdist\x3d41710	.	.	intergenic	PLEKHA5\x3bCAPZA3	dist\x3d296535\x3bdist\x3d41693	.	.	intergenic	RLOC_00023406_lincRNA\x3bRLOC_00023407_protein_coding	dist\x3d135494\x3bdist\x3d41710	.	.	.	.	NA	NA	FALSE	3931	FALSE	NA	0.0044	0	NA	2.36528	1	0.002008	2 days, 10:33:00	NA	NA
GT:AD:DP:GQ:PL	1/1:0,10:10:30:337,30,0	chr27	28395585	NA	A	T	11 days, 2:02:00	PASS	2	0.001818	658	2017-07-17	intronic	PLCZ1	.	.	.	intronic	PLCZ1	.	.	.	intronic	PLCZ1	.	.	.	intronic	RLOC_00023408_protein_coding	.	.	.	.	.	NA	NA	FALSE	16475	FALSE	NA	0.0044	0	NA	4.75833	1	0.0009074	60	0	NA
GT:AD:DP:GQ:PL	1/1:0,26:26:76:751,76,0	chr27	28414484	NA	G	A	31 days, 3:07:00	PASS	2	0.002132	588	2017-07-17	intronic	PLCZ1	.	.	.	intronic	PLCZ1	.	.	.	intronic	PLCZ1	.	.	.	intronic	RLOC_00023408_protein_coding	.	.	.	.	.	NA	NA	FALSE	10162	FALSE	NA	0.107639	0	NA	2.70903	2	0.002128	1 day, 18:22:00	0	NA
GT:AD:DP:GQ:PGT:PID:PL	1/1:0,4:4:12:1|1:28513269_AT_A:163,12,0	chr27	28513275	NA	T	A	18411.9	NA	2	0.005348	264	2017-07-17	intronic	PIK3C2G	.	.	.	intronic	PIK3C2G	.	.	.	intronic	PIK3C2G	.	.	.	intronic	RLOC_00023410_protein_coding	.	.	.	.	.	0.172222	0	FALSE	4418	FALSE	NA	0	0.311806	NA	2.18194	1	0.002674	1 day, 18:19:00	0	0
GT:AD:DP:GQ:PGT:PID:PL	1/1:0,12:12:36:1|1:28718845_GA_G:522,36,0	chr27	28718845	NA	GA	G	123186	PASS	2	0.004604	654	2017-07-17	intronic	PIK3C2G	.	.	.	intronic	PIK3C2G	.	.	.	intronic	PIK3C2G	.	.	.	intronic	RLOC_00023410_protein_coding	.	.	.	.	.	-1.696	0	FALSE	14779	FALSE	NA	0.538889	01:15:00	NA	0.929861	5	0.004596	07:16:00	0	0.306944
GT:AD:DP:GQ:PGT:PID:PL	1/1:0,11:11:36:1|1:28718845_GA_G:522,36,0	chr27	28718849	NA	GGC	G	18 days, 9:02:00	PASS	2	0.001845	650	2017-07-17	intronic	PIK3C2G	.	.	.	intronic	PIK3C2G	.	.	.	intronic	PIK3C2G	.	.	.	intronic	RLOC_00023410_protein_coding	.	.	.	.	.	NA	NA	FALSE	15034	FALSE	NA	0.0044	0	NA	3.72431	2	0.001842	110.73	0	NA
GT:AD:DP:GQ:PL	1/1:0,22:22:66:711,66,0	chr27	28859893	NA	T	C	26 days, 14:41:00	PASS	2	0.001821	658	2017-07-17	intergenic	PIK3C2G\x3bRERGL	dist\x3d41235\x3bdist\x3d84036	.	.	intergenic	PIK3C2G\x3bRERGL	dist\x3d133560\x3bdist\x3d83873	.	.	intergenic	PIK3C2G\x3bRERGL	dist\x3d41695\x3bdist\x3d84040	.	.	intergenic	RLOC_00023412_lincRNA\x3bRLOC_00023413_lincRNA	dist\x3d30120\x3bdist\x3d30577	.	.	.	.	NA	NA	FALSE	17471	FALSE	NA	0.0044	0	NA	5.90694	2	0.001818	60	0	NA
GT:AD:DP:GQ:PL	1/1:0,22:22:66:713,66,0	chr27	28934019	NA	G	C	26 days, 16:43:00	PASS	2	0.001821	658	2017-07-17	intergenic	PIK3C2G\x3bRERGL	dist\x3d115361\x3bdist\x3d9910	.	.	intergenic	PIK3C2G\x3bRERGL	dist\x3d207686\x3bdist\x3d9747	.	.	intergenic	PIK3C2G\x3bRERGL	dist\x3d115821\x3bdist\x3d9914	.	.	ncRNA_intronic	RLOC_00023413_antisense_mRNA	.	.	.	.	.	NA	NA	FALSE	17105	FALSE	NA	0.0044	0	NA	5.19653	2	0.001818	60	0	NA
GT:AD:DP:GQ:PL	1/1:0,26:26:77:813,77,0	chr27	28969780	NA	A	G	30 days, 20:42:00	PASS	2	0.001818	658	2017-07-17	intergenic	RERGL\x3bENSCAFG00000034583	dist\x3d16443\x3bdist\x3d102704	.	.	intergenic	RERGL\x3bENSCAFG00000012592	dist\x3d10392\x3bdist\x3d118899	.	.	intergenic	RERGL\x3bLMO3	dist\x3d10406\x3bdist\x3d1180531	.	.	ncRNA_intronic	RLOC_00023413_antisense_mRNA	.	.	.	.	.	NA	NA	FALSE	17275	FALSE	NA	0.0044	0	NA	5.50486	2	0.001815	60	0	NA
GT:AD:DP:GQ:PGT:PID:PL	1/1:0,14:14:42:1|1:29293426_A_G:541,42,0	chr27	29293426	NA	A	G	19 days, 12:58:00	PASS	2	0.001825	658	2017-07-17	intergenic	ENSCAFG00000029345\x3bENSCAFG00000012600	dist\x3d83006\x3bdist\x3d244668	.	.	intergenic	ENSCAFG00000012592\x3bCFRNASEQ_PROT_00099954	dist\x3d203161\x3bdist\x3d856833	.	.	intergenic	RERGL\x3bLMO3	dist\x3d334052\x3bdist\x3d856885	.	.	intergenic	RLOC_00023416_miRNA\x3bRLOC_00023417_pseudogene	dist\x3d83006\x3bdist\x3d244668	.	.	.	.	NA	NA	FALSE	15863	FALSE	NA	0.0044	0	NA	5.02708	2	0.001821	60	0	NA
GT:AD:DP:GQ:PGT:PID:PL	1/1:0,3:3:9:1|1:29425582_G_T:135,9,0	chr27	29425582	NA	G	T	164.67	PASS	2	0.003043	580	2017-07-17	intergenic	ENSCAFG00000029345\x3bENSCAFG00000012600	dist\x3d215162\x3bdist\x3d112512	.	.	intergenic	ENSCAFG00000012592\x3bCFRNASEQ_PROT_00099954	dist\x3d335317\x3bdist\x3d724677	.	.	intergenic	RERGL\x3bLMO3	dist\x3d466208\x3bdist\x3d724729	.	.	intergenic	RLOC_00023416_miRNA\x3bRLOC_00023417_pseudogene	dist\x3d215162\x3bdist\x3d112512	.	.	.	.	01:52:00	0.475	FALSE	4821	FALSE	NA	0.0045	0	NA	0.075	2	0.002024	40	0	0.223611
GT:AD:DP:GQ:PGT:PID:PL	1/1:0,3:3:9:1|1:29425582_G_T:135,9,0	chr27	29425583	NA	C	CAAA	6 days, 11:57:00	PASS	2	0.003036	584	2017-07-17	intergenic	ENSCAFG00000029345\x3bENSCAFG00000012600	dist\x3d215163\x3bdist\x3d112511	.	.	intergenic	ENSCAFG00000012592\x3bCFRNASEQ_PROT_00099954	dist\x3d335318\x3bdist\x3d724676	.	.	intergenic	RERGL\x3bLMO3	dist\x3d466209\x3bdist\x3d724728	.	.	intergenic	RLOC_00023416_miRNA\x3bRLOC_00023417_pseudogene	dist\x3d215163\x3bdist\x3d112511	.	.	.	.	0.475	0.223611	FALSE	4850	FALSE	NA	0.0045	0	NA	0.531944	2	0.00202	40	0	0.223611
GT:AD:DP:GQ:PGT:PID:PL	1/1:0,3:3:9:1|1:29425582_G_T:135,9,0	chr27	29425585	NA	G	A	164.68	PASS	2	0.003043	582	2017-07-17	intergenic	ENSCAFG00000029345\x3bENSCAFG00000012600	dist\x3d215165\x3bdist\x3d112509	.	.	intergenic	ENSCAFG00000012592\x3bCFRNASEQ_PROT_00099954	dist\x3d335320\x3bdist\x3d724674	.	.	intergenic	RERGL\x3bLMO3	dist\x3d466211\x3bdist\x3d724726	.	.	intergenic	RLOC_00023416_miRNA\x3bRLOC_00023417_pseudogene	dist\x3d215165\x3bdist\x3d112509	.	.	.	.	0.105556	-0.684	FALSE	4828	FALSE	NA	0.0930556	0	NA	0.077	2	0.002024	40	0	0.223611
GT:AD:DP:GQ:PGT:PID:PL	1/1:0,3:3:9:1|1:29425582_G_T:135,9,0	chr27	29425587	NA	C	CAAAAA	155.67	PASS	2	0.003061	576	2017-07-17	intergenic	ENSCAFG00000029345\x3bENSCAFG00000012600	dist\x3d215167\x3bdist\x3d112507	.	.	intergenic	ENSCAFG00000012592\x3bCFRNASEQ_PROT_00099954	dist\x3d335322\x3bdist\x3d724672	.	.	intergenic	RERGL\x3bLMO3	dist\x3d466213\x3bdist\x3d724724	.	.	intergenic	RLOC_00023416_miRNA\x3bRLOC_00023417_pseudogene	dist\x3d215167\x3bdist\x3d112507	.	.	.	.	0.475	-0.956	FALSE	4872	FALSE	NA	0.0944444	0	NA	0.082	2	0.002037	40	0	-0.684
GT:AD:DP:GQ:PL	1/1:0,28:28:84:916,84,0	chr27	29428899	NA	A	C	44 days, 19:05:00	PASS	2	0.002722	658	2017-07-17	intergenic	ENSCAFG00000029345\x3bENSCAFG00000012600	dist\x3d218479\x3bdist\x3d109195	.	.	intergenic	ENSCAFG00000012592\x3bCFRNASEQ_PROT_00099954	dist\x3d338634\x3bdist\x3d721360	.	.	intergenic	RERGL\x3bLMO3	dist\x3d469525\x3bdist\x3d721412	.	.	intergenic	RLOC_00023416_miRNA\x3bRLOC_00023417_pseudogene	dist\x3d218479\x3bdist\x3d109195	.	.	.	.	-1.573	-0.597	FALSE	17431	FALSE	NA	0.0044	0	NA	5.49028	3	0.002717	60	0	-0.922
GT:AD:DP:GQ:PL	1/1:0,20:20:60:658,60,0	chr27	29452709	NA	C	A	31 days, 3:05:00	PASS	2	0.002778	640	2017-07-17	intergenic	ENSCAFG00000029345\x3bENSCAFG00000012600	dist\x3d242289\x3bdist\x3d85385	.	.	intergenic	ENSCAFG00000012592\x3bCFRNASEQ_PROT_00099954	dist\x3d362444\x3bdist\x3d697550	.	.	intergenic	RERGL\x3bLMO3	dist\x3d493335\x3bdist\x3d697602	.	.	intergenic	RLOC_00023416_miRNA\x3bRLOC_00023417_pseudogene	dist\x3d242289\x3bdist\x3d85385	.	.	.	.	0.127778	-0.143	FALSE	13896	FALSE	NA	0.0044	0	NA	3.09444	3	0.002773	2 days, 1:16:00	0	0.572917
GT:AD:DP:GQ:PL	1/1:0,19:19:57:645,57,0	chr27	29455261	NA	G	A	27 days, 1:57:00	PASS	2	0.002732	656	2017-07-17	intergenic	ENSCAFG00000029345\x3bENSCAFG00000012600	dist\x3d244841\x3bdist\x3d82833	.	.	intergenic	ENSCAFG00000012592\x3bCFRNASEQ_PROT_00099954	dist\x3d364996\x3bdist\x3d694998	.	.	intergenic	RERGL\x3bLMO3	dist\x3d495887\x3bdist\x3d695050	.	.	intergenic	RLOC_00023416_miRNA\x3bRLOC_00023417_pseudogene	dist\x3d244841\x3bdist\x3d82833	.	.	Score\x3d535\x3bName\x3dlod\x3d199	.	0.0979167	01:16:00	FALSE	16177	FALSE	NA	0.0044	0	NA	6.0125	3	0.002727	60	0	0.675
GT:AD:DP:GQ:PGT:PID:PL	1/1:0,16:16:48:1|1:29482170_A_T:661,48,0	chr27	29482170	NA	A	T	24 days, 13:48:00	PASS	2	0.001835	658	2017-07-17	intergenic	ENSCAFG00000029345\x3bENSCAFG00000012600	dist\x3d271750\x3bdist\x3d55924	.	.	intergenic	ENSCAFG00000012592\x3bCFRNASEQ_PROT_00099954	dist\x3d391905\x3bdist\x3d668089	.	.	intergenic	RERGL\x3bLMO3	dist\x3d522796\x3bdist\x3d668141	.	.	intergenic	RLOC_00023416_miRNA\x3bRLOC_00023417_pseudogene	dist\x3d271750\x3bdist\x3d55924	.	.	.	.	NA	NA	FALSE	14212	FALSE	NA	0.181944	0	NA	2.32431	2	0.001832	2 days, 3:58:00	0	NA
GT:AD:DP:GQ:PGT:PID:PL	1/1:0,15:15:48:1|1:29482170_A_T:661,48,0	chr27	29482171	NA	T	A	24 days, 13:22:00	PASS	2	0.001835	658	2017-07-17	intergenic	ENSCAFG00000029345\x3bENSCAFG00000012600	dist\x3d271751\x3bdist\x3d55923	.	.	intergenic	ENSCAFG00000012592\x3bCFRNASEQ_PROT_00099954	dist\x3d391906\x3bdist\x3d668088	.	.	intergenic	RERGL\x3bLMO3	dist\x3d522797\x3bdist\x3d668140	.	.	intergenic	RLOC_00023416_miRNA\x3bRLOC_00023417_pseudogene	dist\x3d271751\x3bdist\x3d55923	.	.	.	.	NA	NA	FALSE	14216	FALSE	NA	0.0044	1.054	NA	3.04514	2	0.001832	2 days, 3:17:00	0	NA
GT:AD:DP:GQ:PL	1/1:0,22:22:65:672,65,0	chr27	29540592	NA	A	G	28 days, 11:44:00	PASS	2	0.002722	658	2017-07-17	intergenic	ENSCAFG00000012600\x3bENSCAFG00000028537	dist\x3d2236\x3bdist\x3d47522	.	.	intergenic	ENSCAFG00000012592\x3bCFRNASEQ_PROT_00099954	dist\x3d450327\x3bdist\x3d609667	.	.	intergenic	RERGL\x3bLMO3	dist\x3d581218\x3bdist\x3d609719	.	.	intergenic	RLOC_00023417_pseudogene\x3bRLOC_00023418_miRNA	dist\x3d2236\x3bdist\x3d47522	.	.	.	.	-0.061	-0.796	FALSE	18049	FALSE	NA	0.0044	0	NA	4.82431	3	0.002717	60	0	0.0868056
GT:AD:DP:GQ:PGT:PID:PL	1/1:0,6:6:18:.:.:124,18,0	chr27	29557262	NA	AT	A	63158.4	NA	2	00:01:00	296	2017-07-17	intergenic	ENSCAFG00000012600\x3bENSCAFG00000028537	dist\x3d18907\x3bdist\x3d30851	.	.	intergenic	ENSCAFG00000012592\x3bCFRNASEQ_PROT_00099954	dist\x3d466998\x3bdist\x3d592996	.	.	intergenic	RERGL\x3bLMO3	dist\x3d597889\x3bdist\x3d593048	.	.	intergenic	RLOC_00023417_pseudogene\x3bRLOC_00023418_miRNA	dist\x3d18907\x3bdist\x3d30851	.	.	.	.	0.057	0	FALSE	5231	FALSE	NA	0.0002	0	NA	1.98472	2	0.004049	2 days, 12:25:00	0	0
GT:AD:DP:GQ:PL	1/1:0,16:16:48:527,48,0	chr27	29571242	NA	A	C	759.65	PASS	2	0.002737	658	2017-07-17	intergenic	ENSCAFG00000012600\x3bENSCAFG00000028537	dist\x3d32886\x3bdist\x3d16872	.	.	intergenic	ENSCAFG00000012592\x3bCFRNASEQ_PROT_00099954	dist\x3d480977\x3bdist\x3d579017	.	.	intergenic	RERGL\x3bLMO3	dist\x3d611868\x3bdist\x3d579069	.	.	intergenic	RLOC_00023417_pseudogene\x3bRLOC_00023418_miRNA	dist\x3d32886\x3bdist\x3d16872	.	.	.	.	-2.107	-1.639	FALSE	16171	FALSE	NA	0.0044	0	NA	5.58889	3	0.002732	2 days, 11:07:00	0	-1.452
GT:AD:DP:GQ:PL	1/1:0,30:30:89:942,89,0	chr27	29586216	NA	G	A	42 days, 10:34:00	PASS	2	0.002727	658	2017-07-17	intergenic	ENSCAFG00000012600\x3bENSCAFG00000028537	dist\x3d47860\x3bdist\x3d1898	.	.	intergenic	ENSCAFG00000012592\x3bCFRNASEQ_PROT_00099954	dist\x3d495951\x3bdist\x3d564043	.	.	intergenic	RERGL\x3bLMO3	dist\x3d626842\x3bdist\x3d564095	.	.	intergenic	RLOC_00023417_pseudogene\x3bRLOC_00023418_miRNA	dist\x3d47860\x3bdist\x3d1898	.	.	.	.	-0.076	0	FALSE	17453	FALSE	NA	0.0909722	0.508333	NA	3.14167	3	0.002722	60	0	0
GT:AD:DP:GQ:PL	1/1:0,15:15:45:650,45,0	chr27	29618189	NA	CATTT	C	23 days, 16:52:00	PASS	2	0.001818	658	2017-07-17	intergenic	ENSCAFG00000028537\x3bENSCAFG00000028023	dist\x3d29988\x3bdist\x3d525157	.	.	intergenic	ENSCAFG00000012592\x3bCFRNASEQ_PROT_00099954	dist\x3d527925\x3bdist\x3d532066	.	.	intergenic	RERGL\x3bLMO3	dist\x3d658816\x3bdist\x3d532118	.	.	intergenic	RLOC_00023418_miRNA\x3bRLOC_00023419_snRNA	dist\x3d29988\x3bdist\x3d525157	.	.	.	.	NA	NA	FALSE	16561	FALSE	NA	0.0044	0	NA	3.75069	2	0.001815	60.72	0	NA
GT:AD:DP:GQ:PL	1/1:0,22:22:66:712,66,0	chr27	29765119	NA	C	T	27 days, 10:47:00	PASS	2	0.001869	652	2017-07-17	intergenic	ENSCAFG00000028537\x3bENSCAFG00000028023	dist\x3d176917\x3bdist\x3d378231	.	.	intergenic	ENSCAFG00000012592\x3bCFRNASEQ_PROT_00099954	dist\x3d674854\x3bdist\x3d385140	.	.	intergenic	RERGL\x3bLMO3	dist\x3d805745\x3bdist\x3d385192	.	.	intergenic	RLOC_00023418_miRNA\x3bRLOC_00023419_snRNA	dist\x3d176917\x3bdist\x3d378231	.	.	.	.	NA	NA	FALSE	15125	FALSE	NA	2.00278	0	NA	0.272222	2	0.001866	60	0	NA
GT:AD:DP:GQ:PL	1/1:0,33:33:99:1087,99,0	chr27	29857904	NA	T	C	42 days, 6:43:00	PASS	2	0.001815	658	2017-07-17	intergenic	ENSCAFG00000028537\x3bENSCAFG00000028023	dist\x3d269702\x3bdist\x3d285446	.	.	intergenic	ENSCAFG00000012592\x3bCFRNASEQ_PROT_00099954	dist\x3d767639\x3bdist\x3d292355	.	.	intergenic	RERGL\x3bLMO3	dist\x3d898530\x3bdist\x3d292407	.	.	intergenic	RLOC_00023418_miRNA\x3bRLOC_00023419_snRNA	dist\x3d269702\x3bdist\x3d285446	.	.	.	.	NA	NA	FALSE	17277	FALSE	NA	0.0044	0	NA	5.17153	2	0.001812	60	0	NA
GT:AD:DP:GQ:PL	1/1:0,20:20:60:617,60,0	chr27	29868162	NA	T	C	23 days, 3:55:00	PASS	2	0.002722	658	2017-07-17	intergenic	ENSCAFG00000028537\x3bENSCAFG00000028023	dist\x3d279960\x3bdist\x3d275188	.	.	intergenic	ENSCAFG00000012592\x3bCFRNASEQ_PROT_00099954	dist\x3d777897\x3bdist\x3d282097	.	.	intergenic	RERGL\x3bLMO3	dist\x3d908788\x3bdist\x3d282149	.	.	intergenic	RLOC_00023418_miRNA\x3bRLOC_00023419_snRNA	dist\x3d279960\x3bdist\x3d275188	.	.	.	.	-1.479	0	FALSE	17708	FALSE	NA	0.0044	0	NA	5.49653	3	0.002717	60	0	0
GT:AD:DP:GQ:PGT:PID:PL	1/1:0,23:23:69:1|1:29892156_A_C:994,69,0	chr27	29892180	NA	T	G	46 days, 12:42:00	PASS	2	0.002722	658	2017-07-17	intergenic	ENSCAFG00000028537\x3bENSCAFG00000028023	dist\x3d303978\x3bdist\x3d251170	.	.	intergenic	ENSCAFG00000012592\x3bCFRNASEQ_PROT_00099954	dist\x3d801915\x3bdist\x3d258079	.	.	intergenic	RERGL\x3bLMO3	dist\x3d932806\x3bdist\x3d258131	.	.	intergenic	RLOC_00023418_miRNA\x3bRLOC_00023419_snRNA	dist\x3d303978\x3bdist\x3d251170	.	.	.	.	0	0	FALSE	17871	FALSE	NA	0.0044	0	NA	3.37083	3	0.002717	60	0	0
GT:AD:DP:GQ:PGT:PID:PL	1/1:0,7:7:21:.:.:227,21,0	chr27	30051445	NA	AT	A	20525	PASS	2	0.004823	322	2017-07-17	intergenic	ENSCAFG00000028537\x3bENSCAFG00000028023	dist\x3d463244\x3bdist\x3d91904	.	.	intergenic	ENSCAFG00000012592\x3bCFRNASEQ_PROT_00099954	dist\x3d961181\x3bdist\x3d98813	.	.	intergenic	RERGL\x3bLMO3	dist\x3d1092072\x3bdist\x3d98865	.	.	intergenic	RLOC_00023418_miRNA\x3bRLOC_00023419_snRNA	dist\x3d463244\x3bdist\x3d91904	.	.	.	.	-0.648	0	FALSE	13557	FALSE	NA	1.71458	0.377083	NA	1.60069	2	0.003215	23:38:00	0	0
GT:AD:DP:GQ:PL	1/1:0,18:18:54:591,54,0	chr27	30078372	NA	G	A	21 days, 14:45:00	PASS	2	0.001818	658	2017-07-17	intergenic	ENSCAFG00000028537\x3bENSCAFG00000028023	dist\x3d490170\x3bdist\x3d64978	.	.	intergenic	ENSCAFG00000012592\x3bCFRNASEQ_PROT_00099954	dist\x3d988107\x3bdist\x3d71887	.	.	intergenic	RERGL\x3bLMO3	dist\x3d1118998\x3bdist\x3d71939	.	.	intergenic	RLOC_00023418_miRNA\x3bRLOC_00023419_snRNA	dist\x3d490170\x3bdist\x3d64978	.	.	Score\x3d694\x3bName\x3dlod\x3d879	.	NA	NA	FALSE	17240	FALSE	NA	0.0044	0	NA	4.95486	2	0.001815	60	0	NA
GT:AD:DP:GQ:PL	1/1:0,19:19:57:636,57,0	chr27	30157350	NA	G	T	23 days, 11:46:00	PASS	2	0.001825	658	2017-07-17	intronic	LMO3	.	.	.	intronic	LMO3	.	.	.	splicing	LMO3	XM_005637097.3:exon1:c.76+1G>T	.	.	intronic	RLOC_00023421_protein_coding	.	.	.	Score\x3d579\x3bName\x3dlod\x3d302	.	NA	NA	FALSE	17061	FALSE	NA	0.0044	0	NA	4.72292	2	0.001821	60	0	NA
GT:AD:DP:GQ:PL	1/1:0,13:13:39:327,39,0	chr27	30161813	NA	T	TA	12 days, 19:49:00	PASS	2	0.002732	658	2017-07-17	intronic	LMO3	.	.	.	intronic	LMO3	.	.	.	intronic	LMO3	.	.	.	intronic	RLOC_00023421_protein_coding	.	.	.	.	.	0.507639	0.507639	FALSE	17780	FALSE	NA	0.18125	0.599306	NA	3.36736	3	0.002727	2 days, 3:05:00	0	-0.731
GT:AD:DP:GQ:PL	1/1:0,12:12:36:352,36,0	chr27	30169418	NA	A	G	11 days, 16:01:00	PASS	2	0.001815	658	2017-07-17	intronic	LMO3	.	.	.	intronic	LMO3	.	.	.	intronic	LMO3	.	.	.	intronic	RLOC_00023421_protein_coding	.	.	.	.	.	NA	NA	FALSE	15754	FALSE	NA	0.0044	0	NA	4.33819	2	0.001812	57.82	0	NA
GT:AD:DP:GQ:PL	1/1:0,19:19:57:614,57,0	chr27	30172050	NA	C	T	22 days, 13:44:00	PASS	2	0.001815	658	2017-07-17	intronic	LMO3	.	.	.	intronic	LMO3	.	.	.	intronic	LMO3	.	.	.	intronic	RLOC_00023421_protein_coding	.	.	.	.	.	NA	NA	FALSE	17533	FALSE	NA	0.0044	0	NA	5.31042	2	0.001812	60	0	NA
GT:AD:DP:GQ:PGT:PID:PL	1/1:0,23:23:72:1|1:30174133_G_A:1020,72,0	chr27	30174133	NA	G	A	39 days, 11:49:00	PASS	2	0.001821	658	2017-07-17	intronic	LMO3	.	.	.	intronic	LMO3	.	.	.	intronic	LMO3	.	.	.	intronic	RLOC_00023421_protein_coding	.	.	.	.	.	NA	NA	FALSE	17071	FALSE	NA	0.0044	0	NA	5.72431	2	0.001818	60	0	NA
GT:AD:DP:GQ:PL	1/1:0,11:11:33:384,33,0	chr27	30183540	NA	G	T	13 days, 0:41:00	PASS	2	0.001828	656	2017-07-17	intronic	LMO3	.	.	.	intronic	LMO3	.	.	.	intronic	LMO3	.	.	.	intronic	RLOC_00023421_protein_coding	.	.	.	.	.	NA	NA	FALSE	15528	FALSE	NA	0.0044	0	NA	5.86181	2	0.001825	60	0	NA
GT:AD:DP:GQ:PL	1/1:0,9:9:30:335,30,0	chr27	30184628	NA	T	TAA	11 days, 20:26:00	PASS	2	0.001818	658	2017-07-17	intronic	LMO3	.	.	.	intronic	LMO3	.	.	.	intronic	LMO3	.	.	.	intronic	RLOC_00023421_protein_coding	.	.	.	.	.	0.288889	0	FALSE	17120	FALSE	NA	0.026	0.7	NA	3.10972	1	0.0009074	5 days, 16:08:00	0	0
GT:AD:DP:GQ:PL	1/1:0,18:18:54:629,54,0	chr27	30335066	NA	T	A	23 days, 4:46:00	PASS	2	0.001818	658	2017-07-17	intergenic	LMO3\x3bMGST1	dist\x3d126494\x3bdist\x3d34602	.	.	intergenic	LMO3\x3bMGST1	dist\x3d126494\x3bdist\x3d34602	.	.	intergenic	LMO3\x3bMGST1	dist\x3d126780\x3bdist\x3d35522	.	.	intergenic	RLOC_00023421_protein_coding\x3bRLOC_00023422_protein_coding	dist\x3d126494\x3bdist\x3d34602	.	.	.	.	NA	NA	FALSE	17393	FALSE	NA	0.0044	0	NA	0.477083	2	0.001815	60	0	NA
GT:AD:DP:GQ:PL	1/1:1,22:23:33:616,33,0	chr27	30335274	NA	A	G	22 days, 16:38:00	PASS	2	0.001812	658	2017-07-17	intergenic	LMO3\x3bMGST1	dist\x3d126702\x3bdist\x3d34394	.	.	intergenic	LMO3\x3bMGST1	dist\x3d126702\x3bdist\x3d34394	.	.	intergenic	LMO3\x3bMGST1	dist\x3d126988\x3bdist\x3d35314	.	.	intergenic	RLOC_00023421_protein_coding\x3bRLOC_00023422_protein_coding	dist\x3d126702\x3bdist\x3d34394	.	.	.	.	-0.916	0	FALSE	17374	FALSE	NA	0.0044	0	NA	5.90347	2	0.001808	60	0	0
GT:AD:DP:GQ:PL	1/1:0,20:20:60:685,60,0	chr27	30337523	NA	A	T	25 days, 12:42:00	PASS	2	0.001818	658	2017-07-17	intergenic	LMO3\x3bMGST1	dist\x3d128951\x3bdist\x3d32145	.	.	intergenic	LMO3\x3bMGST1	dist\x3d128951\x3bdist\x3d32145	.	.	intergenic	LMO3\x3bMGST1	dist\x3d129237\x3bdist\x3d33065	.	.	intergenic	RLOC_00023421_protein_coding\x3bRLOC_00023422_protein_coding	dist\x3d128951\x3bdist\x3d32145	.	.	.	.	NA	NA	FALSE	17842	FALSE	NA	0.0044	0	NA	5.69514	2	0.001815	60	0	NA
GT:AD:DP:GQ:PL	1/1:0,20:20:60:590,60,0	chr27	30352629	NA	A	G	21 days, 13:48:00	PASS	2	0.001812	658	2017-07-17	intergenic	LMO3\x3bMGST1	dist\x3d144057\x3bdist\x3d17039	.	.	intergenic	LMO3\x3bMGST1	dist\x3d144057\x3bdist\x3d17039	.	.	intergenic	LMO3\x3bMGST1	dist\x3d144343\x3bdist\x3d17959	.	.	intergenic	RLOC_00023421_protein_coding\x3bRLOC_00023422_protein_coding	dist\x3d144057\x3bdist\x3d17039	.	.	.	.	NA	NA	FALSE	17037	FALSE	NA	0.0044	0	NA	6.21736	2	0.001808	60	0	NA
GT:AD:DP:GQ:PL	1/1:0,21:21:63:695,63,0	chr27	30652062	NA	A	T	25 days, 22:44:00	PASS	2	0.001815	658	2017-07-17	intergenic	ENSCAFG00000034586\x3bDERA	dist\x3d9086\x3bdist\x3d23272	.	.	intergenic	SLC15A5\x3bDERA	dist\x3d118189\x3bdist\x3d19918	.	.	intergenic	SLC15A5\x3bDERA	dist\x3d117669\x3bdist\x3d23163	.	.	intergenic	RLOC_00023426_lincRNA\x3bRLOC_00023427_protein_coding	dist\x3d1886\x3bdist\x3d19918	.	.	.	.	NA	NA	FALSE	16789	FALSE	NA	0.0044	0	NA	6.39236	2	0.001812	2 days, 9:33:00	0	NA
GT:AD:DP:GQ:PL	1/1:0,20:20:60:606,60,0	chr27	30698819	NA	T	C	22 days, 5:42:00	PASS	2	0.001815	658	2017-07-17	intronic	DERA	.	.	.	intronic	DERA	.	.	.	intronic	DERA	.	.	.	intronic	RLOC_00023427_protein_coding	.	.	.	.	.	NA	NA	FALSE	16893	FALSE	NA	0.0044	0	NA	5.78611	2	0.001812	60	0	NA
GT:AD:DP:GQ:PL	1/1:0,19:19:57:651,57,0	chr27	30718063	NA	C	A	27 days, 0:47:00	PASS	2	0.001815	658	2017-07-17	intronic	DERA	.	.	.	intronic	DERA	.	.	.	intronic	DERA	.	.	.	ncRNA_exonic	RLOC_00023427_TUCp	.	.	.	.	.	01:15:00	0	FALSE	15910	FALSE	NA	0.302778	0.373611	NA	2.83681	2	0.001812	60	0	0
GT:AD:DP:GQ:PGT:PID:PL	1/1:0,16:16:48:1|1:30778216_T_TG:720,48,0	chr27	30778240	NA	G	C	27 days, 23:44:00	PASS	2	0.001845	646	2017-07-17	intergenic	DERA\x3bENSCAFG00000037333	dist\x3d38143\x3bdist\x3d14307	.	.	intergenic	DERA\x3bCFRNASEQ_PROT_00102169	dist\x3d27926\x3bdist\x3d7797	.	.	intergenic	DERA\x3bSTRAP	dist\x3d37038\x3bdist\x3d22613	.	.	intergenic	RLOC_00023427_protein_coding\x3bRLOC_00023428_protein_coding	dist\x3d17455\x3bdist\x3d7797	.	.	.	.	NA	NA	FALSE	14216	FALSE	NA	0.0044	0	NA	0.376389	2	0.001842	60	0	NA
GT:AD:DP:GQ:PL	1/1:0,25:25:75:850,75,0	chr27	30821787	NA	C	G	48 days, 17:51:00	PASS	2	0.002732	658	2017-07-17	ncRNA_intronic	ENSCAFG00000035130	.	.	.	intergenic	CFRNASEQ_PROT_00099969\x3bEPS8	dist\x3d2989\x3bdist\x3d72143	.	.	intergenic	STRAP\x3bEPS8	dist\x3d4209\x3bdist\x3d72097	.	.	intergenic	RLOC_00023430_protein_coding\x3bRLOC_00023431_antisense_mRNA	dist\x3d2989\x3bdist\x3d69349	.	.	.	.	0.511111	0.511111	FALSE	17836	FALSE	NA	0.182639	0	NA	2.75278	3	0.002727	2 days, 3:45:00	0	01:54:00
GT:AD:DP:GQ:PGT:PID:PL	1/1:0,7:7:21:1|1:30832794_G_C:313,21,0	chr27	30832794	NA	G	C	247.71	PASS	2	0.001842	656	2017-07-17	ncRNA_intronic	ENSCAFG00000035130	.	.	.	intergenic	CFRNASEQ_PROT_00099969\x3bEPS8	dist\x3d13996\x3bdist\x3d61136	.	.	intergenic	STRAP\x3bEPS8	dist\x3d15216\x3bdist\x3d61090	.	.	intergenic	RLOC_00023430_protein_coding\x3bRLOC_00023431_antisense_mRNA	dist\x3d13996\x3bdist\x3d58342	.	.	.	.	NA	NA	FALSE	12658	FALSE	NA	0.182639	0	NA	1.85833	1	0.0009191	53.93	0	NA
GT:AD:DP:GQ:PGT:PID:PL	1/1:0,7:7:21:1|1:30832794_G_C:313,21,0	chr27	30832796	NA	T	C	10 days, 7:53:00	PASS	2	0.001842	656	2017-07-17	ncRNA_intronic	ENSCAFG00000035130	.	.	.	intergenic	CFRNASEQ_PROT_00099969\x3bEPS8	dist\x3d13998\x3bdist\x3d61134	.	.	intergenic	STRAP\x3bEPS8	dist\x3d15218\x3bdist\x3d61088	.	.	intergenic	RLOC_00023430_protein_coding\x3bRLOC_00023431_antisense_mRNA	dist\x3d13998\x3bdist\x3d58340	.	.	.	.	NA	NA	FALSE	12852	FALSE	NA	0.0044	0	NA	3.13681	1	0.0009191	53.93	0	NA
GT:AD:DP:GQ:PGT:PID:PL	1/1:0,22:22:66:1|1:30847992_G_T:967,66,0	chr27	30847992	NA	G	T	37 days, 6:47:00	PASS	2	0.001818	658	2017-07-17	ncRNA_intronic	ENSCAFG00000035130	.	.	.	intergenic	CFRNASEQ_PROT_00099969\x3bEPS8	dist\x3d29194\x3bdist\x3d45938	.	.	intergenic	STRAP\x3bEPS8	dist\x3d30414\x3bdist\x3d45892	.	.	intergenic	RLOC_00023430_protein_coding\x3bRLOC_00023431_antisense_mRNA	dist\x3d29194\x3bdist\x3d43144	.	.	.	.	NA	NA	FALSE	16690	FALSE	NA	0.013	0	NA	4.70278	2	0.001815	60	0	NA
GT:AD:DP:GQ:PGT:PID:PL	1/1:0,11:11:45:.:.:656,45,0	chr27	30848552	NA	T	TA	104515	PASS	2	0.002773	644	2017-07-17	ncRNA_intronic	ENSCAFG00000035130	.	.	.	intergenic	CFRNASEQ_PROT_00099969\x3bEPS8	dist\x3d29754\x3bdist\x3d45378	.	.	intergenic	STRAP\x3bEPS8	dist\x3d30974\x3bdist\x3d45332	.	.	intergenic	RLOC_00023430_protein_coding\x3bRLOC_00023431_antisense_mRNA	dist\x3d29754\x3bdist\x3d42584	.	.	.	.	-0.04	0	FALSE	16979	FALSE	NA	3.46111	0.142361	NA	-0.0449	2	0.001845	0.851389	0	-1.304
GT:AD:DP:GQ:PGT:PID:PL	1/1:0,11:11:33:.:.:476,33,0	chr27	30848555	NA	TTGATA	T	102284	PASS	2	0.002773	644	2017-07-17	ncRNA_intronic	ENSCAFG00000035130	.	.	.	intergenic	CFRNASEQ_PROT_00099969\x3bEPS8	dist\x3d29758\x3bdist\x3d45370	.	.	intergenic	STRAP\x3bEPS8	dist\x3d30978\x3bdist\x3d45324	.	.	intergenic	RLOC_00023430_protein_coding\x3bRLOC_00023431_antisense_mRNA	dist\x3d29758\x3bdist\x3d42576	.	.	.	.	-1.346	0	FALSE	16986	FALSE	NA	2.20486	0.485417	NA	0.691667	3	0.002768	0.184028	0	-1.285
GT:AD:DP:GQ:PL	1/1:1,9:10:20:260,20,0	chr27	30848898	NA	T	G	187 days, 22:01:00	NA	2	0.004115	290	2017-07-17	ncRNA_intronic	ENSCAFG00000035130	.	.	.	intergenic	CFRNASEQ_PROT_00099969\x3bEPS8	dist\x3d30100\x3bdist\x3d45032	.	.	intergenic	STRAP\x3bEPS8	dist\x3d31320\x3bdist\x3d44986	.	.	intergenic	RLOC_00023430_protein_coding\x3bRLOC_00023431_antisense_mRNA	dist\x3d30100\x3bdist\x3d42238	.	.	.	.	0.0868056	0	FALSE	4309	FALSE	NA	0.0001	0.495139	NA	0.2375	1	0.002058	0.484722	NA	-0.126
GT:AD:DP:GQ:PL	1/1:0,10:10:30:343,30,0	chr27	30865898	NA	A	C	48 days, 17:45:00	PASS	2	0.004554	658	2017-07-17	intergenic	ENSCAFG00000035130\x3bENSCAFG00000012705	dist\x3d12929\x3bdist\x3d54050	.	.	intergenic	CFRNASEQ_PROT_00099969\x3bEPS8	dist\x3d47100\x3bdist\x3d28032	.	.	intergenic	STRAP\x3bEPS8	dist\x3d48320\x3bdist\x3d27986	.	.	intergenic	RLOC_00023430_protein_coding\x3bRLOC_00023431_antisense_mRNA	dist\x3d47100\x3bdist\x3d25238	.	.	.	.	0.504861	-0.727	FALSE	16580	FALSE	NA	0.0909722	0.494444	NA	3.45486	5	0.004545	50.71	0	0.504861
GT:AD:DP:GQ:PL	1/1:0,10:10:30:328,30,0	chr27	30868342	NA	C	T	33 days, 20:55:00	PASS	2	0.00457	656	2017-07-17	intergenic	ENSCAFG00000035130\x3bENSCAFG00000012705	dist\x3d15373\x3bdist\x3d51606	.	.	intergenic	CFRNASEQ_PROT_00099969\x3bEPS8	dist\x3d49544\x3bdist\x3d25588	.	.	intergenic	STRAP\x3bEPS8	dist\x3d50764\x3bdist\x3d25542	.	.	intergenic	RLOC_00023430_protein_coding\x3bRLOC_00023431_antisense_mRNA	dist\x3d49544\x3bdist\x3d22794	.	.	.	.	-0.518	0	FALSE	13950	FALSE	NA	0	0	NA	0.484722	5	0.004562	34.64	0	0
GT:AD:DP:GQ:PL	1/1:0,16:16:48:532,48,0	chr27	31615905	NA	A	T	19 days, 3:56:00	PASS	2	0.001821	658	2017-07-17	intergenic	ENSCAFG00000036902\x3bENSCAFG00000012874	dist\x3d61789\x3bdist\x3d24762	.	.	intergenic	RERG\x3bPDE6H	dist\x3d86984\x3bdist\x3d24762	.	.	intergenic	RERG\x3bPDE6H	dist\x3d89067\x3bdist\x3d24826	.	.	intergenic	RLOC_00023437_protein_coding\x3bRLOC_00023438_protein_coding	dist\x3d86984\x3bdist\x3d24762	.	.	.	.	NA	NA	FALSE	15973	FALSE	NA	0.0044	0	NA	4.62569	2	0.001818	2 days, 2:04:00	0	NA
GT:AD:DP:GQ:PGT:PID:PL	1/1:0,17:17:50:.:.:500,50,0	chr27	31656901	NA	A	G	13443	NA	2	0.004132	296	2017-07-17	intronic	ENSCAFG00000012874	.	.	.	intronic	PDE6H	.	.	.	intronic	PDE6H	.	.	.	ncRNA_intronic	RLOC_00023438_TUCp	.	.	.	.	.	0.129167	0	FALSE	5229	FALSE	NA	0.0923611	0	NA	1.13125	2	0.004132	2 days, 7:27:00	NA	-0.842
GT:AD:DP:GQ:PL	1/1:0,14:14:42:485,42,0	chr27	31668871	NA	G	A	783.79	PASS	2	0.002732	656	2017-07-17	intronic	ARHGDIB	.	.	.	intronic	ARHGDIB	.	.	.	intronic	ARHGDIB	.	.	.	ncRNA_intronic	RLOC_00023438_TUCp	.	.	.	.	.	02:49:00	0	FALSE	15391	FALSE	NA	0.0044	0	NA	5.28333	3	0.002727	60	0	0
GT:AD:DP:GQ:PL	1/1:0,14:14:42:424,42,0	chr27	31804558	NA	C	T	351.61	PASS	2	0.001815	658	2017-07-17	intergenic	SMCO3\x3bWBP11	dist\x3d1488\x3bdist\x3d3192	.	.	intergenic	C12orf69\x3bH2AFJ	dist\x3d1488\x3bdist\x3d23841	.	.	intronic	C27H12orf60	.	.	.	ncRNA_intronic	RLOC_00023442_glncRNA	.	.	.	.	.	NA	NA	FALSE	14069	FALSE	NA	0.0044	0	NA	4.77708	2	0.001812	60	0	NA
GT:AD:DP:GQ:PGT:PID:PL	1/1:0,2:2:6:1|1:32573642_A_G:77,6,0	chr27	32573642	NA	A	G	4 days, 22:46:00	PASS	2	0.002773	652	2017-07-17	intronic	GRIN2B	.	.	.	intronic	NMDE2_CANFA	.	.	.	intronic	GRIN2B	.	.	.	intronic	RLOC_00023465_protein_coding	.	.	.	.	.	-0.275	0	FALSE	15861	FALSE	NA	5.87917	0	NA	0.740972	2	0.001845	4 days, 9:07:00	0	0
GT:AD:DP:GQ:PL	1/1:0,8:8:24:296,24,0	chr27	32971474	NA	AAG	A	30 days, 7:27:00	PASS	2	0.001832	658	2017-07-17	intergenic	GRIN2B\x3bENSCAFG00000034846	dist\x3d93819\x3bdist\x3d156636	.	.	intergenic	NMDE2_CANFA\x3bEMP1	dist\x3d69623\x3bdist\x3d206163	.	.	intergenic	GRIN2B\x3bEMP1	dist\x3d87869\x3bdist\x3d206398	.	.	intergenic	RLOC_00023467_lincRNA\x3bRLOC_00023468_lincRNA	dist\x3d38839\x3bdist\x3d156638	.	.	.	.	-0.973	0	FALSE	11752	FALSE	NA	0.0044	0	NA	2.13264	1	0.0009141	57.65	0	-1.225
GT:AD:DP:GQ:PL	1/1:0,9:9:27:300,27,0	chr27	33387190	NA	C	T	230.97	PASS	2	0.001852	646	2017-07-17	intronic	HEBP1	.	.	.	intronic	HEBP1	.	.	.	intronic	HEBP1	.	.	.	intronic	RLOC_00023475_protein_coding	.	.	.	.	.	-1.736	0.402083	FALSE	15571	FALSE	NA	0.0045	0	NA	1.31319	1	0.0009242	1 day, 13:53:00	0	-1.273
GT:AD:DP:GQ:PL	1/1:0,19:19:57:608,57,0	chr27	33439024	NA	A	G	22 days, 7:43:00	PASS	2	0.001812	658	2017-07-17	intergenic	5S_rRNA\x3bGPRC5A	dist\x3d5320\x3bdist\x3d2767	.	.	exonic	GPRC5A	.	unknown	UNKNOWN	UTR3	GPRC5A	XM_014108738.2:c.*2767T>C	.	.	UTR3	RLOC_00023478_protein_coding	GPRC5A_2:c.*2767T>C\x3bTCONS_00113188:c.*2807T>C\x3bTCONS_00113187:c.*2767T>C\x3bGPRC5A_1:c.*72T>C\x3bTCONS_00113186:c.*2807T>C\x3bTCONS_00113189:c.*2767T>C	.	.	.	.	NA	NA	FALSE	16057	FALSE	NA	0.0044	0	NA	5.32153	2	0.001808	60	0	NA
GT:AD:DP:GQ:PL	1/1:0,19:19:57:615,57,0	chr27	33479203	NA	G	A	22 days, 14:45:00	PASS	2	0.001821	656	2017-07-17	intergenic	GPRC5A\x3bDDX47	dist\x3d18826\x3bdist\x3d31171	.	.	intergenic	GPRC5A\x3bDDX47	dist\x3d18826\x3bdist\x3d30525	.	.	intergenic	GPRC5A\x3bDDX47	dist\x3d19141\x3bdist\x3d30756	.	.	intergenic	RLOC_00023478_protein_coding\x3bRLOC_00023480_protein_coding	dist\x3d18826\x3bdist\x3d30525	.	.	.	.	NA	NA	FALSE	16741	FALSE	NA	0.0044	0	NA	5.82153	2	0.001818	60	0	NA
GT:AD:DP:GQ:PGT:PID:PL	1/1:0,20:20:63:1|1:33541736_C_T:935,63,0	chr27	33541736	NA	C	T	37 days, 13:12:00	PASS	2	0.001818	658	2017-07-17	intergenic	DDX47\x3bAPOLD1	dist\x3d15828\x3bdist\x3d3966	.	.	exonic	APOLD1	.	unknown	UNKNOWN	downstream	APOLD1	dist\x3d910	.	.	UTR3	RLOC_00023481_protein_coding	APOLD1_6:c.*3966G>A\x3bAPOLD1_1:c.*3966G>A\x3bAPOLD1_2:c.*3966G>A\x3bAPOLD1_5:c.*3966G>A\x3bAPOLD1_3:c.*3966G>A\x3bAPOLD1_4:c.*3966G>A	.	.	.	.	NA	NA	FALSE	17222	FALSE	NA	0.0044	0	NA	5.5875	2	0.001815	60	0	NA
GT:AD:DP:GQ:PL	1/1:0,19:19:57:647,57,0	chr27	33587160	NA	G	A	23 days, 22:43:00	PASS	2	0.001818	658	2017-07-17	intergenic	ENSCAFG00000033180\x3bCDKN1B	dist\x3d6318\x3bdist\x3d19733	.	.	intronic	CFRNASEQ_PROT_00102272	.	.	.	intergenic	APOLD1\x3bCDKN1B	dist\x3d38263\x3bdist\x3d21994	.	.	intronic	RLOC_00023482_protein_coding	.	.	.	.	.	NA	NA	FALSE	16418	FALSE	NA	0.0044	0	NA	5.34931	2	0.001815	60	0	NA
GT:AD:DP:GQ:PL:PGT:PID	1/1:0,5:5:15:172,15,0:.:.	chr27	33596176	NA	A	G	4 days, 17:14:00	PASS	2	0.001927	618	2017-07-17	intergenic	ENSCAFG00000033180\x3bCDKN1B	dist\x3d15334\x3bdist\x3d10717	.	.	intronic	CFRNASEQ_PROT_00102272	.	.	.	intergenic	APOLD1\x3bCDKN1B	dist\x3d47279\x3bdist\x3d12978	.	.	intronic	RLOC_00023482_protein_coding	.	.	.	.	.	-2.27	-1.678	FALSE	12021	FALSE	NA	1.36319	0	NA	0.0854167	1	0.0009615	2 days, 7:55:00	0	-0.691
GT:AD:DP:GQ:PGT:PID:PL	1/1:0,8:8:23:.:.:207,23,0	chr27	33617320	NA	A	T	28771.4	GATKstd	2	0.013	494	2017-07-17	intergenic	CDKN1B\x3bGPR19	dist\x3d4414\x3bdist\x3d54193	.	.	intergenic	Q68V02_CANFA\x3bGPR19	dist\x3d3764\x3bdist\x3d15740	.	.	intergenic	CDKN1B\x3bGPR19	dist\x3d3762\x3bdist\x3d15728	.	.	intronic	RLOC_00023483_protein_coding	.	.	.	.	.	0.511111	-0.736	FALSE	7137	FALSE	NA	2.65139	0.509722	NA	1.39306	4	0.005051	03:32:00	0	-0.736
GT:AD:DP:GQ:PGT:PID:PL	1/1:0,9:9:27:.:.:396,27,0	chr27	33696558	NA	T	TAAA	51639.2	NA	2	0.004098	298	2017-07-17	intronic	CREBL2	.	.	.	intronic	CREBL2	.	.	.	intronic	CREBL2	.	.	.	ncRNA_intronic	RLOC_00023485_TUCp	.	.	.	.	.	-0.13	0	FALSE	4692	FALSE	NA	0	0.427083	NA	2.16944	1	0.002049	2 days, 10:43:00	0	0
GT:AD:DP:GQ:PL:PGT:PID	1/1:0,31:31:93:1035,93,0:.:.	chr27	33908013	NA	C	T	40 days, 2:46:00	PASS	2	0.001815	658	2017-07-17	intronic	BORCS5	.	.	.	intronic	LOH12CR1	.	.	.	intronic	BORCS5	.	.	.	intronic	RLOC_00023487_protein_coding	.	.	.	.	.	NA	NA	FALSE	16933	FALSE	NA	0.0044	0	NA	4.61597	2	0.001812	60	0	NA
GT:AD:DP:GQ:PL	1/1:0,12:12:36:384,36,0	chr27	33934848	NA	C	T	13 days, 0:21:00	PASS	2	0.002012	618	2017-07-17	UTR5	BORCS5	ENSCAFT00000046363.1:c.-232G>A	.	.	exonic	LOH12CR1	.	unknown	UNKNOWN	UTR5	BORCS5	XM_543811.6:c.-232G>A\x3bXM_005637135.3:c.-232G>A\x3bXM_005637137.3:c.-232G>A	.	.	UTR5	RLOC_00023487_protein_coding	TCONS_00113240:c.-232G>A\x3bLOH12CR1_4:c.-232G>A\x3bLOH12CR1_6:c.-232G>A	.	.	.	.	NA	NA	FALSE	11654	FALSE	NA	0.0045	0	NA	3.91389	2	0.002008	60	0	NA
GT:AD:DP:GQ:PL	1/1:0,25:25:75:846,75,0	chr27	33992393	NA	G	A	32 days, 5:49:00	PASS	2	0.001818	658	2017-07-17	intergenic	MANSC1\x3bLRP6	dist\x3d29590\x3bdist\x3d11257	.	.	intergenic	LOH12CR1\x3bLRP6	dist\x3d57172\x3bdist\x3d10604	.	.	intergenic	MANSC1\x3bLRP6	dist\x3d30614\x3bdist\x3d10941	.	.	ncRNA_exonic	RLOC_00023489_antisense_mRNA	.	.	.	.	.	NA	NA	FALSE	17176	FALSE	NA	0.0044	0	NA	4.42431	2	0.001815	60	0	NA
GT:AD:DP:GQ:PL	1/1:0,26:26:78:838,78,0	chr27	34187145	NA	C	G	31 days, 21:44:00	PASS	2	0.001825	658	2017-07-17	exonic	BCL2L14	.	nonsynonymous_SNV	BCL2L14:ENSCAFT00000021199.3:exon3:c.625G>C:p.D209H	exonic	BCL2L14	.	unknown	UNKNOWN	exonic	BCL2L14	.	nonsynonymous_SNV	BCL2L14:XM_005637141.2:exon4:c.634G>C:p.D212H,BCL2L14:XM_022411264.1:exon5:c.625G>C:p.D209H,BCL2L14:XM_534887.4:exon5:c.661G>C:p.D221H,BCL2L14:XM_022411263.1:exon6:c.625G>C:p.D209H,BCL2L14:XM_005637143.3:exon7:c.625G>C:p.D209H,BCL2L14:XM_005637146.2:exon7:c.625G>C:p.D209H,BCL2L14:XM_022411265.1:exon7:c.625G>C:p.D209H	exonic	RLOC_00023492_protein_coding	.	nonsynonymous_SNV	RLOC_00023492_protein_coding:BCL2L14_2:exon3:c.625G>C:p.D209H,RLOC_00023492_protein_coding:BCL2L14_4:exon6:c.661G>C:p.D221H,RLOC_00023492_protein_coding:BCL2L14_3:exon7:c.625G>C:p.D209H	Score\x3d383\x3bName\x3dlod\x3d48	.	NA	NA	FALSE	16409	FALSE	NA	0.0044	0	NA	5.07292	2	0.001821	60	0	NA
GT:AD:DP:GQ:PL	1/1:0,21:21:64:946,64,0	chr27	34259225	NA	ACCTCTGTTGTAAG	A	36 days, 0:39:00	PASS	2	0.001815	658	2017-07-17	ncRNA_intronic	ENSCAFG00000033883	.	.	.	intergenic	BCL2L14\x3bETV6	dist\x3d42742\x3bdist\x3d87772	.	.	intergenic	BCL2L14\x3bETV6	dist\x3d42852\x3bdist\x3d91968	.	.	ncRNA_intronic	RLOC_00023493_glncRNA	.	.	.	.	.	NA	NA	FALSE	16289	FALSE	NA	0.0044	0	NA	4.90625	2	0.001812	60	0	NA
GT:AD:DP:GQ:PL	1/1:0,18:18:54:590,54,0	chr27	34261199	NA	G	A	110 days, 19:02:00	PASS	2	0.008197	658	2017-07-17	ncRNA_intronic	ENSCAFG00000033883	.	.	.	intergenic	BCL2L14\x3bETV6	dist\x3d44715\x3bdist\x3d85811	.	.	intergenic	BCL2L14\x3bETV6	dist\x3d44825\x3bdist\x3d90007	.	.	ncRNA_intronic	RLOC_00023493_glncRNA	.	.	.	.	.	0.563889	0	FALSE	17414	FALSE	NA	0.0044	0	NA	5.62361	9	0.008182	60	0	0
GT:AD:DP:GQ:PL	1/1:0,22:22:65:684,65,0	chr27	34377018	NA	G	A	25 days, 11:59:00	PASS	2	0.001818	658	2017-07-17	intronic	ETV6	.	.	.	intronic	ETV6	.	.	.	intronic	ETV6	.	.	.	intronic	RLOC_00023494_protein_coding	.	.	.	.	.	NA	NA	FALSE	14552	FALSE	NA	0.0909722	0	NA	3.28403	2	0.001815	60	0	NA
GT:AD:DP:GQ:PL	1/1:2,17:19:37:542,37,0	chr27	34531119	NA	C	A	20 days, 5:58:00	PASS	2	0.001828	658	2017-07-17	intronic	ETV6	.	.	.	intronic	ETV6	.	.	.	intronic	ETV6	.	.	.	intronic	RLOC_00023494_protein_coding	.	.	.	.	.	02:46:00	0	FALSE	14971	FALSE	NA	0.0044	0	NA	0.491667	2	0.001825	60	0	0
GT:AD:DP:GQ:PGT:PID:PL	1/1:0,4:4:12:.:.:156,12,0	chr27	36767339	NA	G	GGAAA	13085.4	PASS	2	0.022	196	2017-07-17	upstream	KLRG1	dist\x3d562	.	.	upstream	KLRG1	dist\x3d562	.	.	intronic	KLRG1	.	.	.	upstream	RLOC_00023550_protein_coding	dist\x3d562	.	.	.	.	0.55	0	FALSE	1692	FALSE	NA	0	0.920833	NA	4.36042	2	0.007246	1 day, 12:31:00	0	-0.18
GT:AD:DP:GQ:PGT:PID:PL	1/1:0,3:3:9:1|1:36767390_G_A:135,9,0	chr27	36767412	NA	GAA	G	25591	PASS	2	0.004213	452	2017-07-17	upstream	KLRG1	dist\x3d636	.	.	upstream	KLRG1	dist\x3d636	.	.	intronic	KLRG1	.	.	.	upstream	RLOC_00023550_protein_coding	dist\x3d636	.	.	.	.	-2.093	-0.65	FALSE	4571	FALSE	NA	0	6.035	NA	3.54236	2	0.002801	07:44:00	0	0.350694
GT:AD:DP:GQ:PGT:PID:PL	1/1:0,3:3:9:1|1:36767390_G_A:135,9,0,.,.,.	chr27	36767416	NA	GAAAGAA	G,GAGAA	259 days, 4:05:00	PASS	2	0.005128,0.00463	400	2017-07-17	upstream	KLRG1	dist\x3d640	.	.	upstream	KLRG1	dist\x3d640	.	.	intronic	KLRG1	.	.	.	upstream	RLOC_00023550_protein_coding	dist\x3d640	.	.	.	.	0	-1.271	FALSE	5428	FALSE	NA	0.0022	09:41:00	NA	1.19931	1.2	0.002564,0.003077	15:56:00	0	-1.271
GT:AD:DP:GQ:PGT:PID:PL	1/1:0,8:8:18:.:.:348,18,0	chr27	38333054	NA	T	TAATCAAACCTAAAAATAAGCAAGACTAAAAGCATATTTAAGC	10680	NA	2	0.004505	268	2017-07-17	intergenic	COPS7A\x3bPIANP	dist\x3d19000\x3bdist\x3d8000	.	.	intergenic	COPS7A\x3bPIANP	dist\x3d19000\x3bdist\x3d6629	.	.	intergenic	COPS7A\x3bPIANP	dist\x3d19253\x3bdist\x3d6666	.	.	intergenic	RLOC_00023610_protein_coding\x3bRLOC_00023611_protein_coding	dist\x3d18459\x3bdist\x3d6629	.	.	.	.	01:36:00	0	FALSE	4616	FALSE	NA	0	0.290972	NA	2.55972	1	0.002252	53.67	NA	0.328472
[truncated: 21 more columns]
